# Supplementary material for: Catalyst-free and solvent-free hydroboration of alkynes
Source: Royal Society of Chemistry journal article supplement (doi:10.1039/d0nj02612c), 2020-01-01
Supplement: d0nj02612c1.pdf [file d0nj02612c1.pdf]

## Supporting Information

### Catalyst-free and Solvent-free Hydroboration of Alkynes

Ashok Kumar Jaladi, Hyeon Seong Choi, and Duk Keun An\*

*Department of Chemistry, Kangwon National University*

*Chuncheon 24341, Republic of Korea*

*E-mail: [dkan@kangwon.ac.kr](mailto:dkan@kangwon.ac.kr)*

#### Table of Contents

|                                                                       |         |
|-----------------------------------------------------------------------|---------|
| I. Copies of NMR spectra .....                                        | S1– S38 |
| II. Chemoselective hydroboration of phenyl acetylene over ester ..... | S39     |
| III. References .....                                                 | S40     |

## I. Copies of NMR spectra

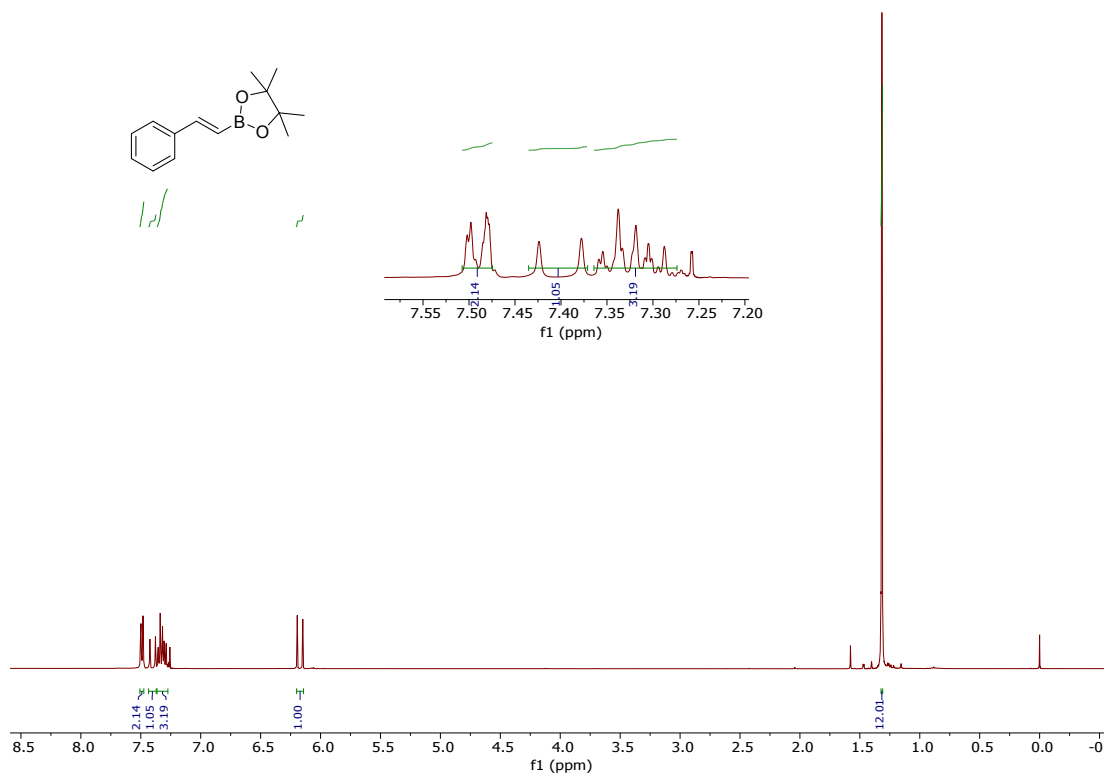

Figure S1: <sup>1</sup>H NMR of (*E*)-4,4,5,5-tetramethyl-2-styryl-1,3,2-dioxaborolane (**2a**)<sup>1</sup>

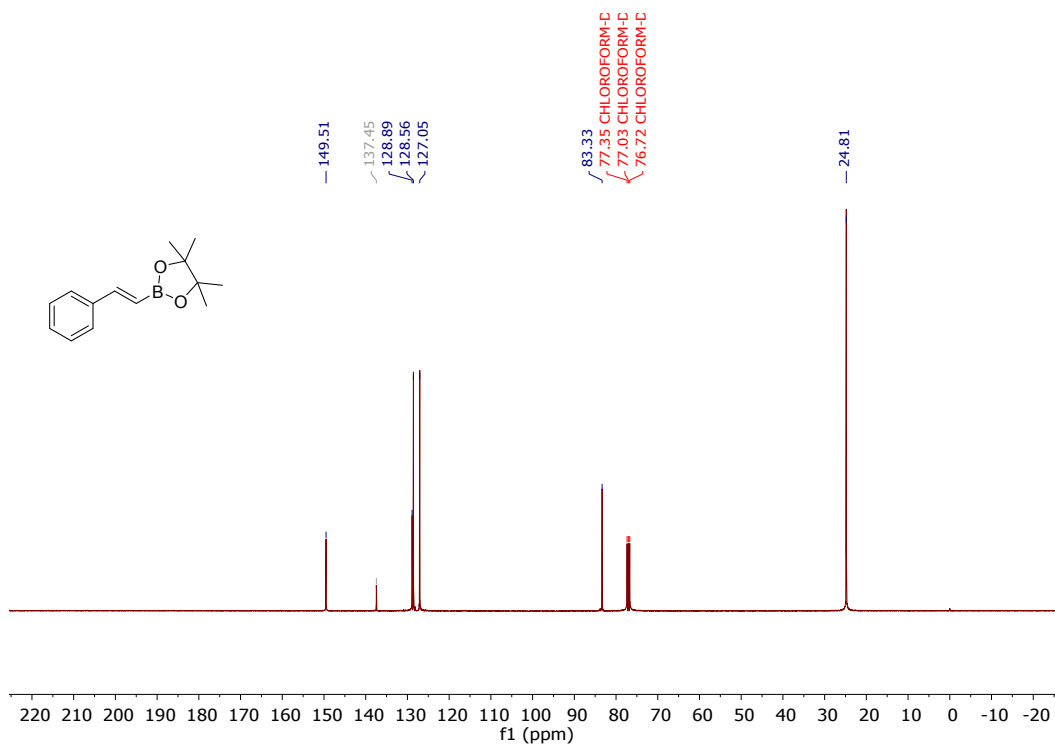

Figure S2: <sup>13</sup>C NMR of (*E*)-4,4,5,5-tetramethyl-2-styryl-1,3,2-dioxaborolane (**2a**)<sup>1</sup>

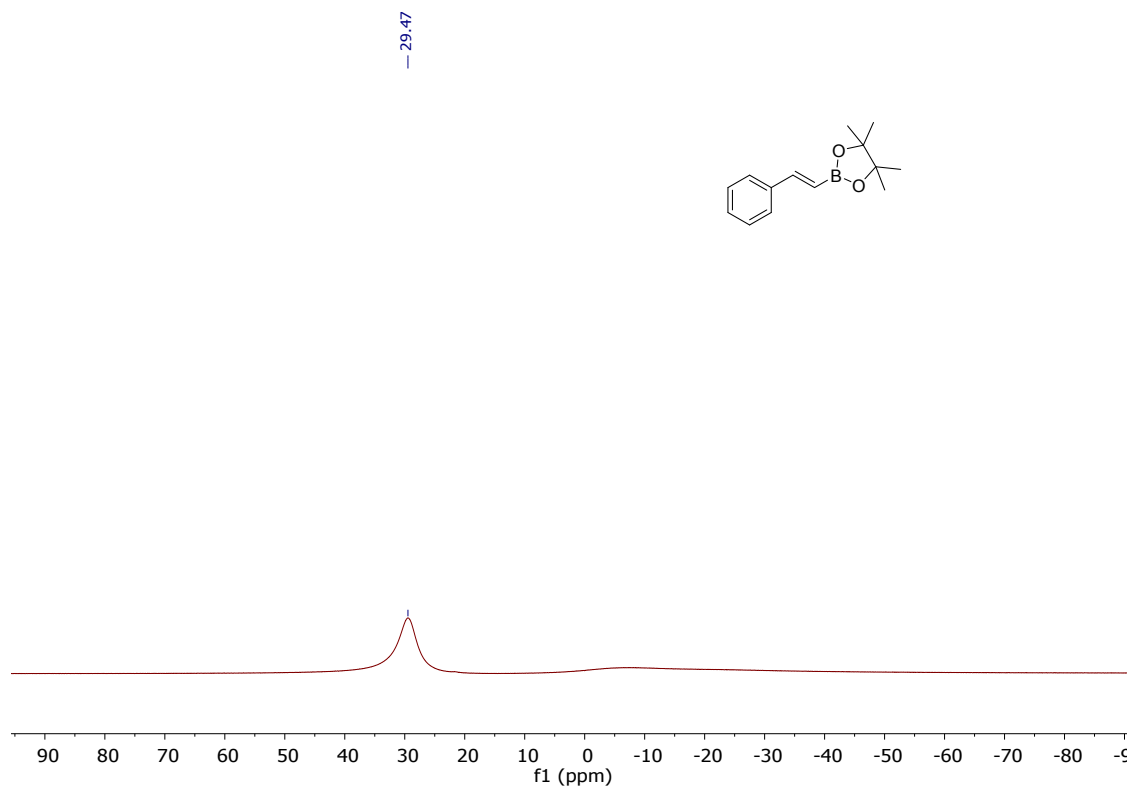

**Figure S3 :**  $^{11}\text{B}$  NMR of (*E*)-4,4,5,5-tetramethyl-2-styryl-1,3,2-dioxaborolane (**2a**)<sup>12</sup>

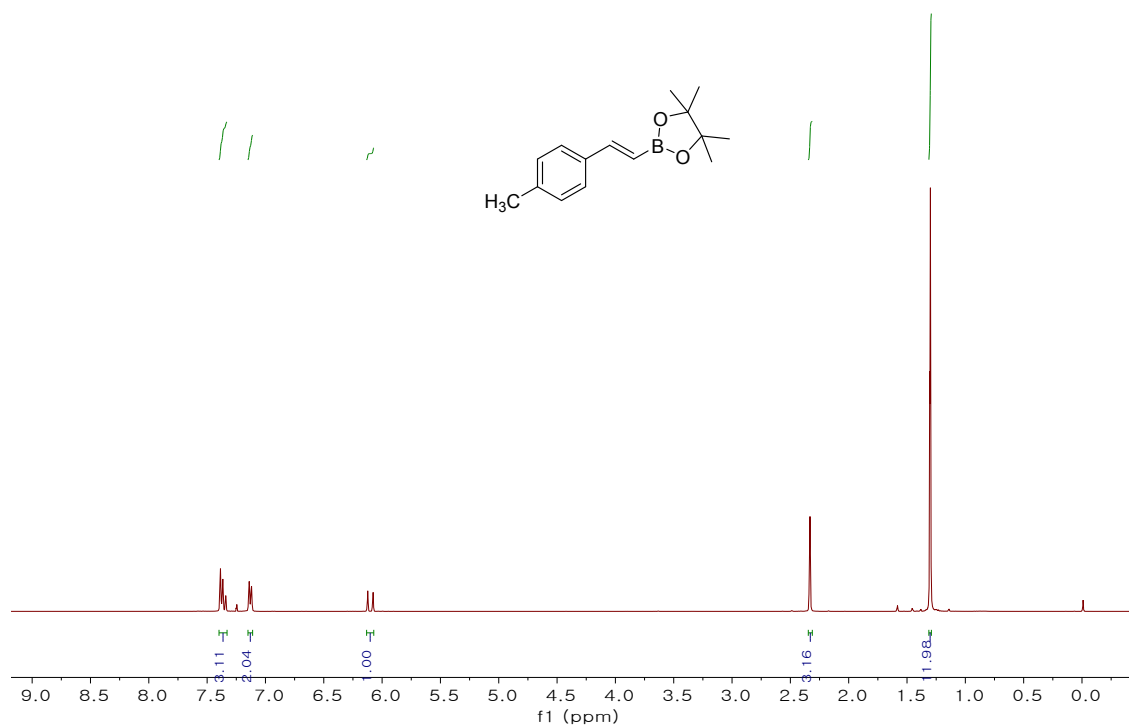

**Figure S4:**  $^1\text{H}$  NMR of (*E*)-4,4,5,5-tetramethyl-2-(4-methylstyryl)-1,3,2-dioxaborolane (**2b**)<sup>2</sup>

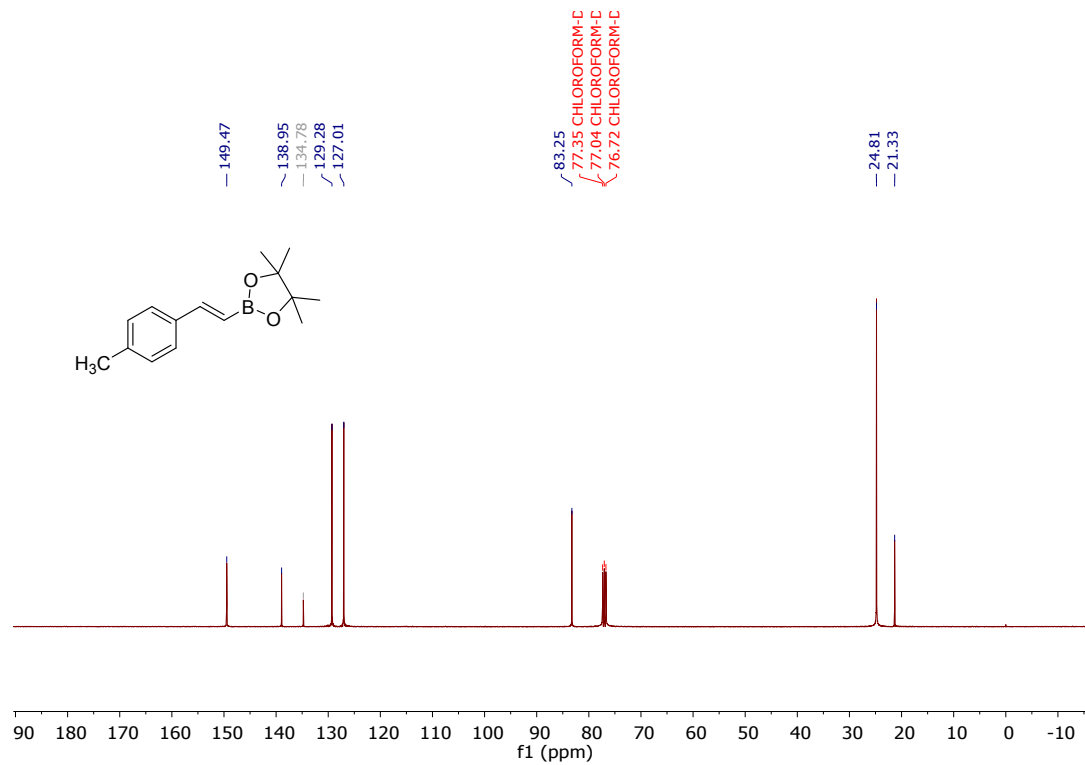

**Figure S5:** <sup>13</sup>C NMR of *(E)*-4,4,5,5-tetramethyl-2-(4-methylstyryl)-1,3,2-dioxaborolane (**2b**)<sup>2</sup>

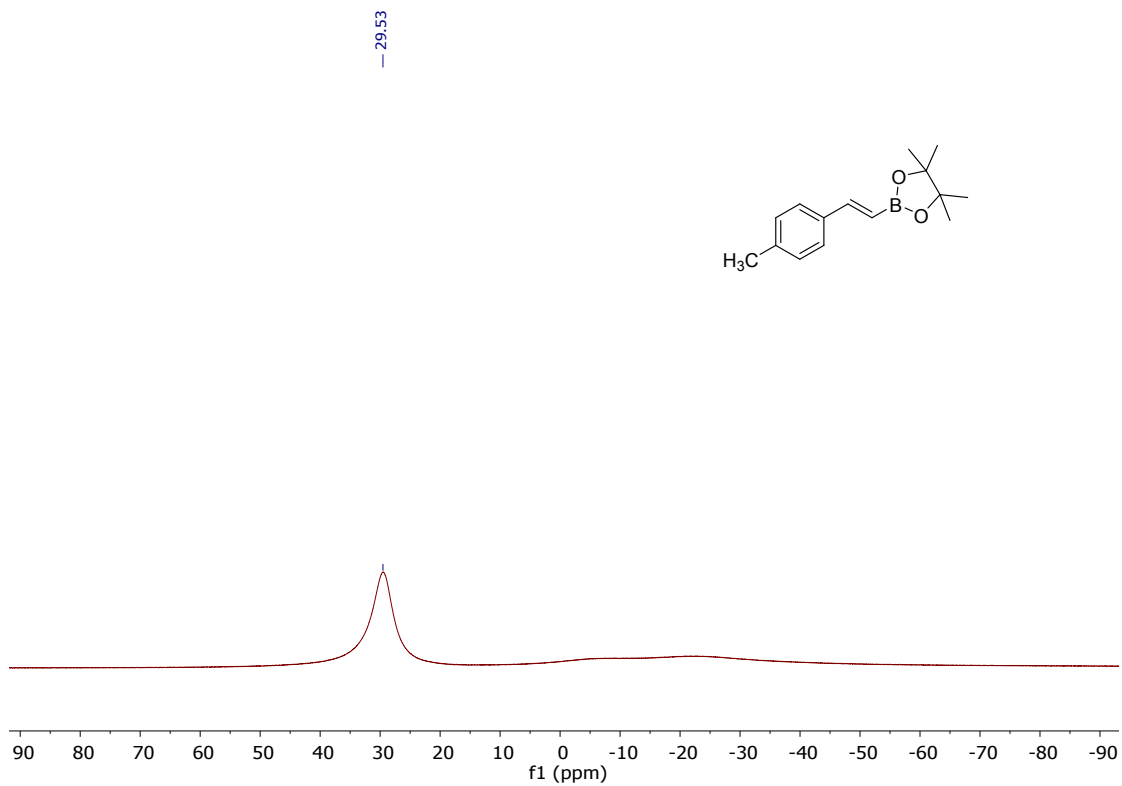

**Figure S6:** <sup>11</sup>B NMR of *(E)*-4,4,5,5-tetramethyl-2-(4-methylstyryl)-1,3,2-dioxaborolane (**2b**)<sup>12</sup>

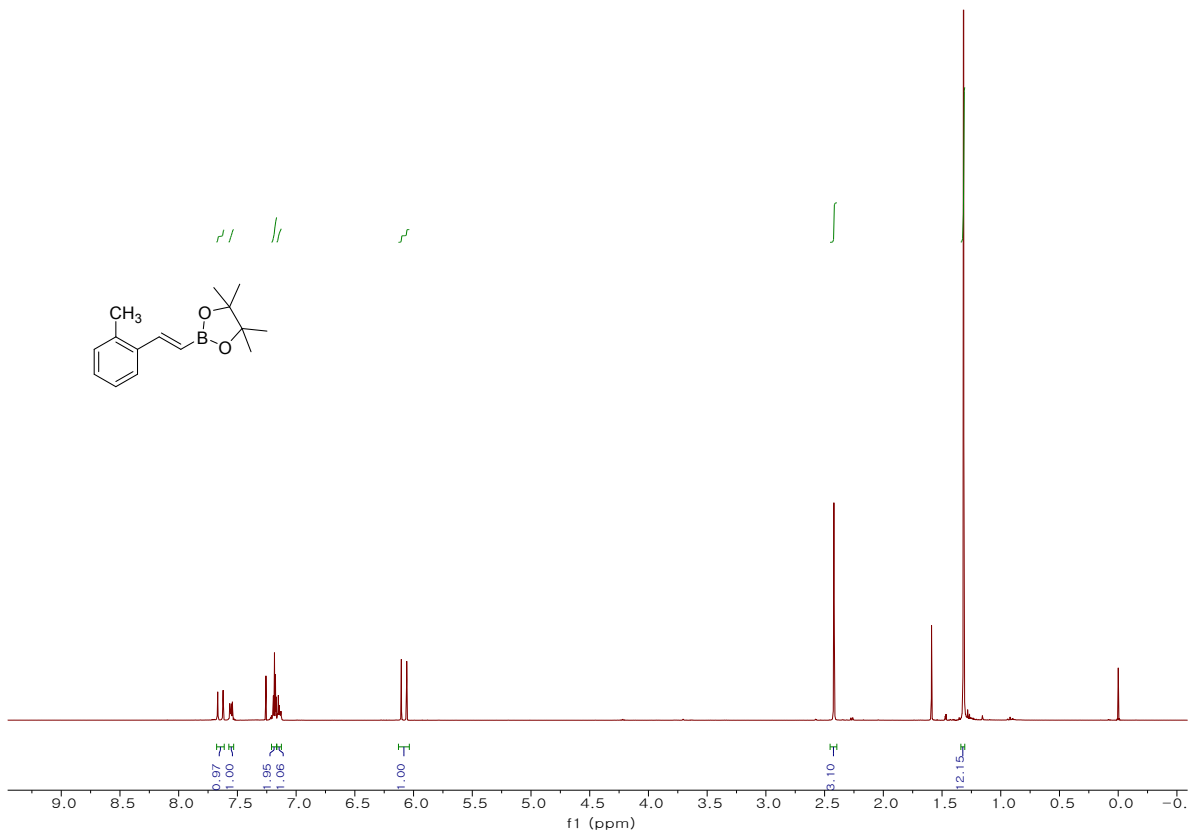

**Figure S7:** <sup>1</sup>H NMR of (*E*)-4,4,5,5-tetramethyl-2-(2-methylstyryl)-1,3,2-dioxaborolane (**2c**)<sup>7</sup>

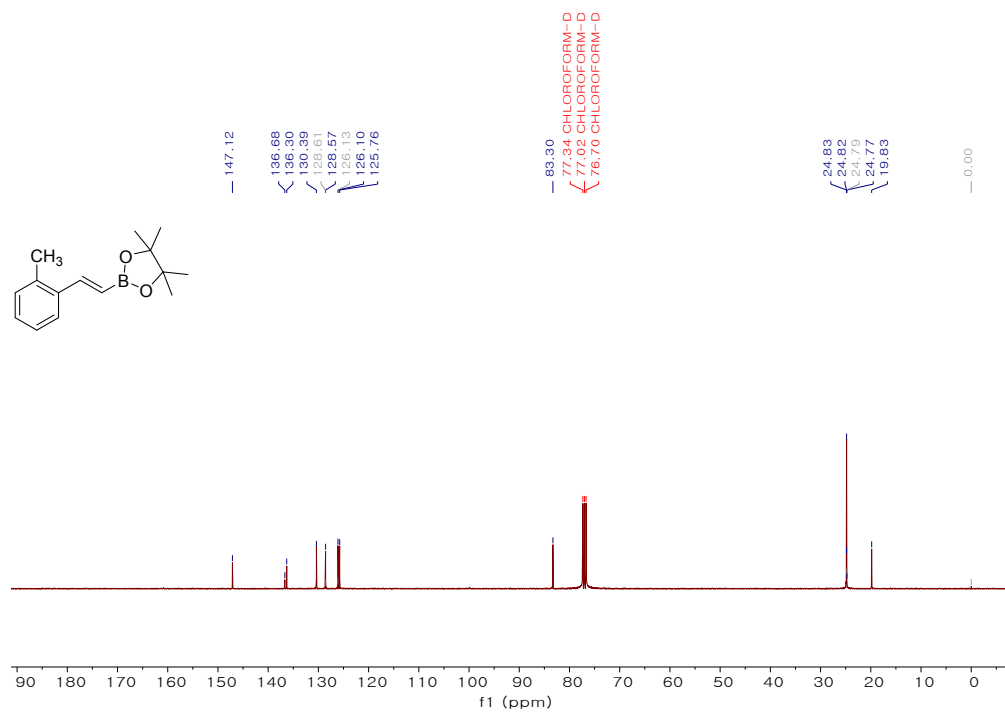

**Figure S8:** <sup>13</sup>C NMR of (*E*)-4,4,5,5-tetramethyl-2-(2-methylstyryl)-1,3,2-dioxaborolane (**2c**)<sup>7</sup>

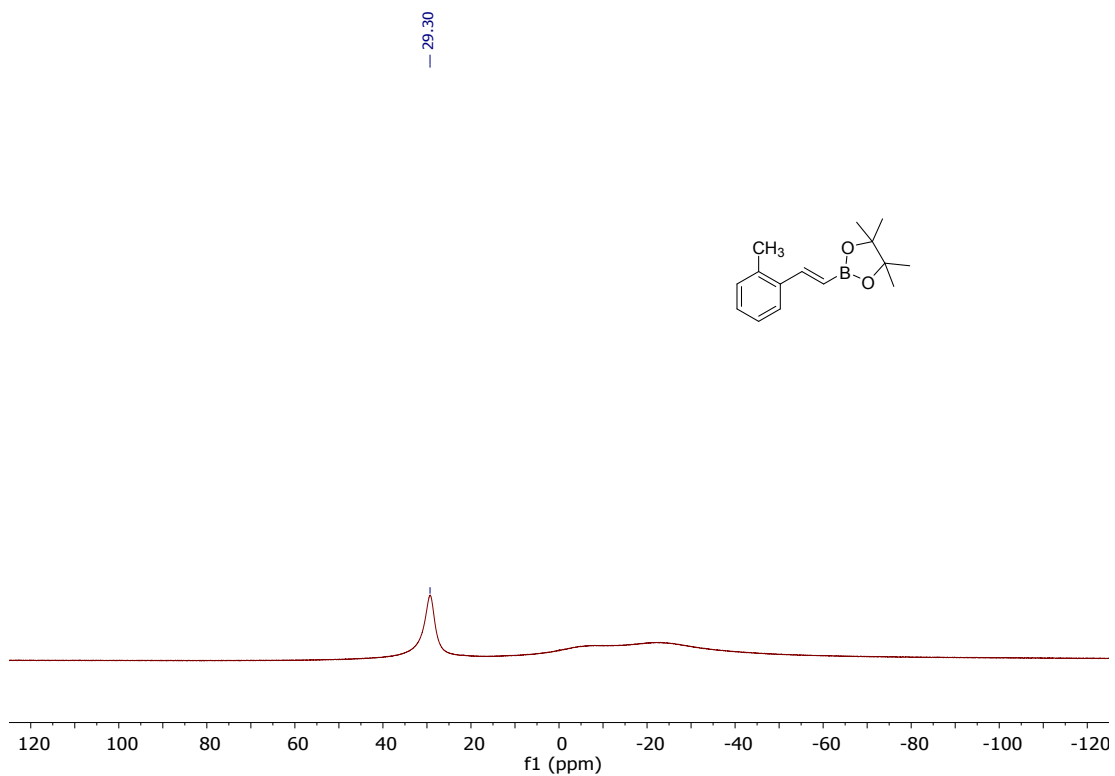

**Figure S9:**  $^{11}\text{B}$  NMR of (*E*)-4,4,5,5-tetramethyl-2-(2-methylstyryl)-1,3,2-dioxaborolane (**2c**)<sup>12</sup>

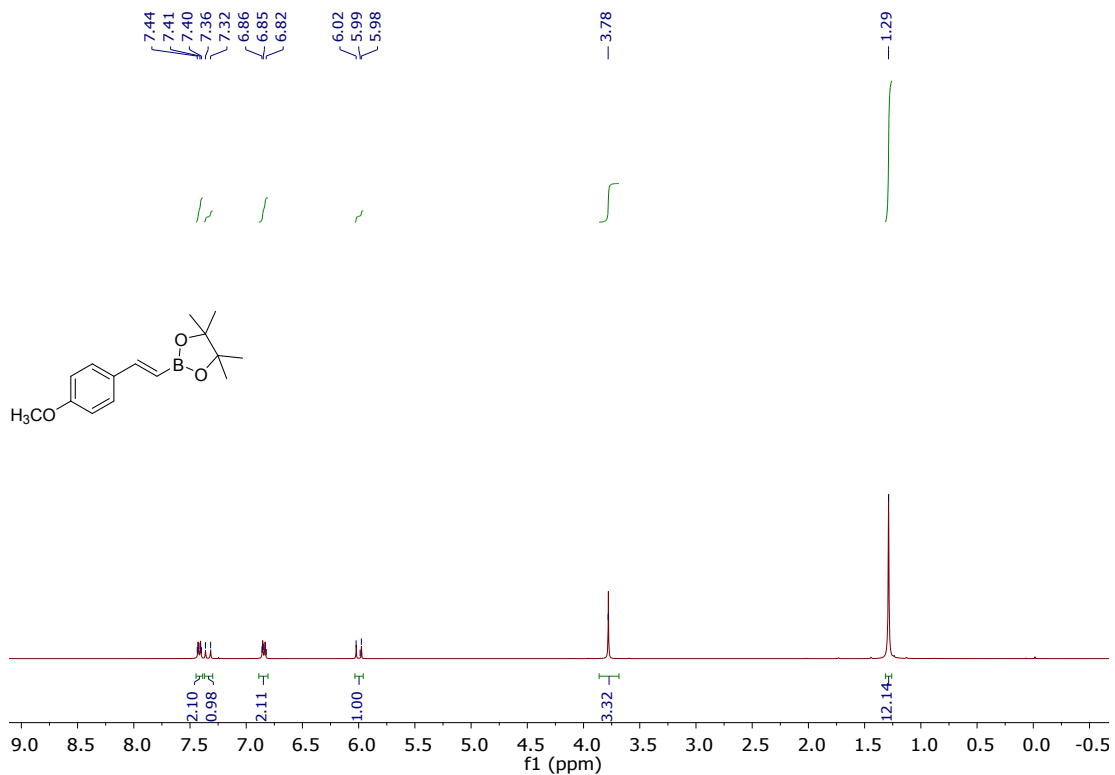

**Figure S10:**  $^1\text{H}$  NMR of (*E*)-2-(4-methoxystyryl)-4,4,5,5-tetramethyl-1,3,2-dioxaborolane (**2d**)<sup>1</sup>

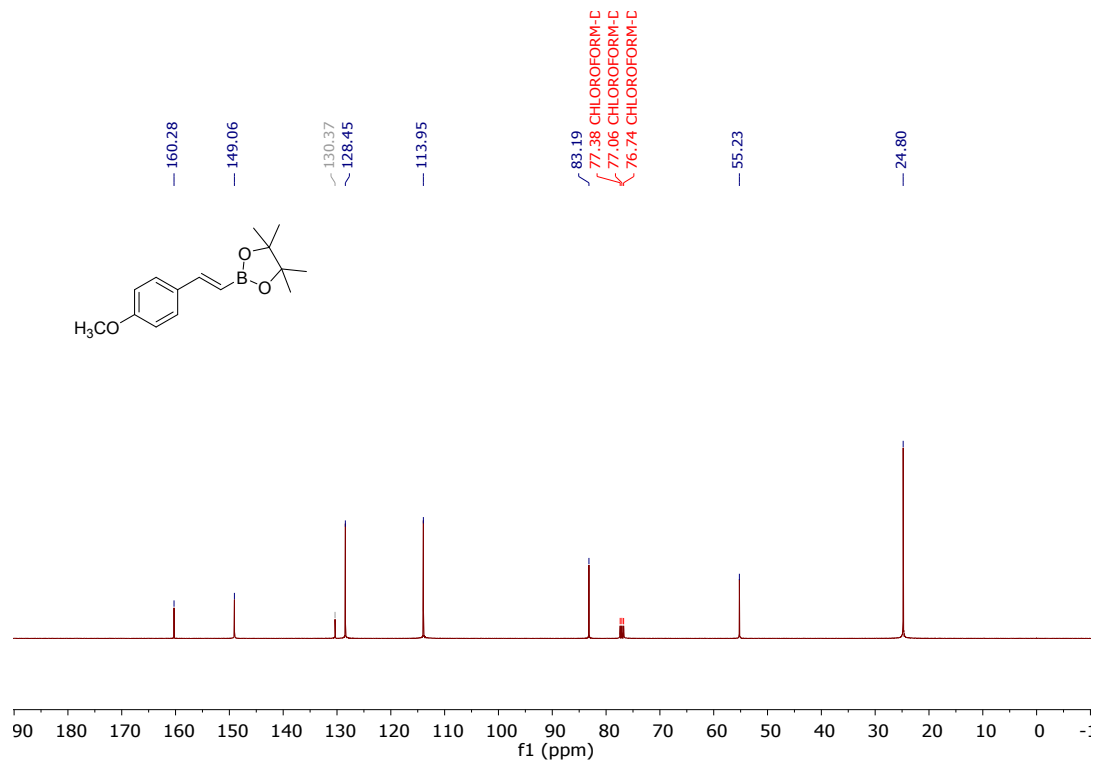

**Figure S11:**  $^{13}\text{C}$  NMR of *(E)*-2-(4-methoxystyryl)-4,4,5,5-tetramethyl-1,3,2-dioxaborolane (**2d**)<sup>1</sup>

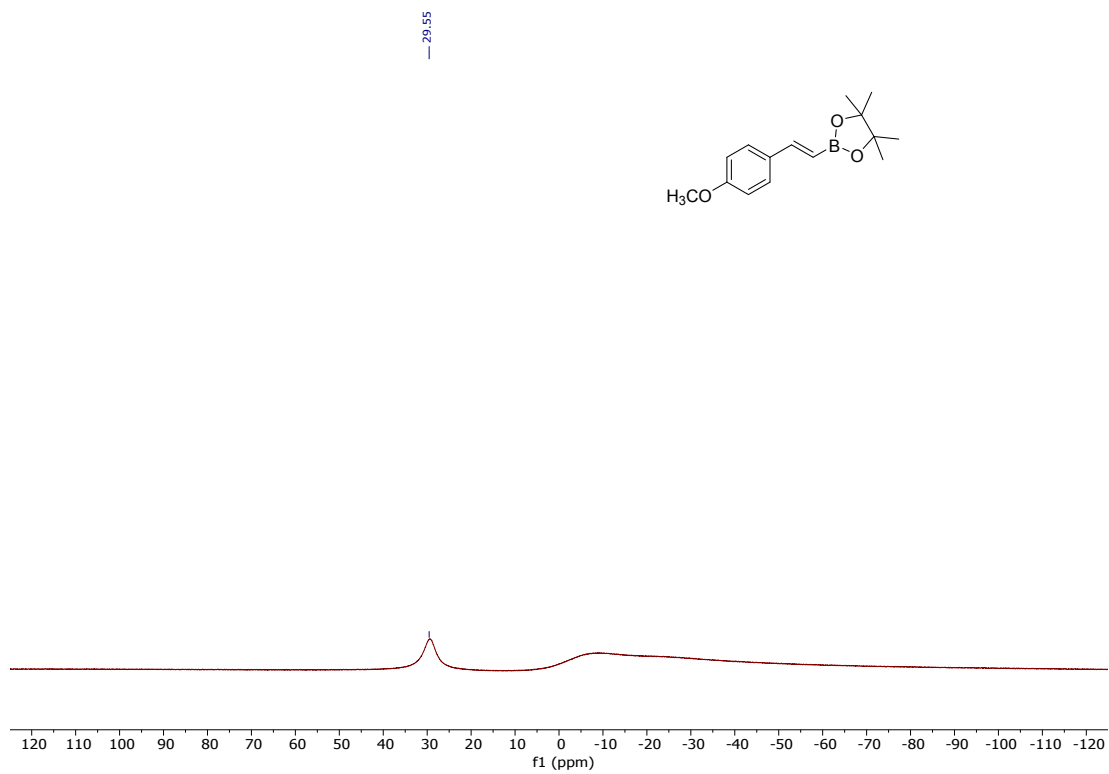

**Figure S12:**  $^{11}\text{B}$  NMR of *(E)*-2-(4-methoxystyryl)-4,4,5,5-tetramethyl-1,3,2-dioxaborolane (**2d**)<sup>12</sup>

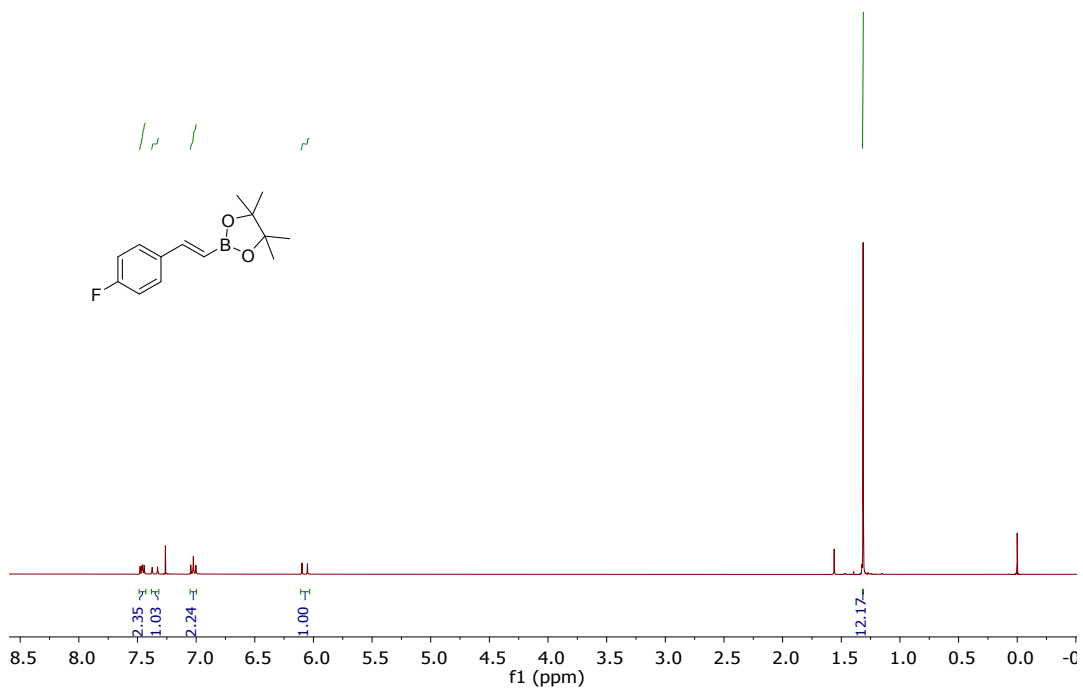

**Figure S13:** <sup>1</sup>H NMR of (*E*)-2-(4-fluorostyryl)-4,4,5,5-tetramethyl-1,3,2-dioxaborolane (**2e**)<sup>1</sup>

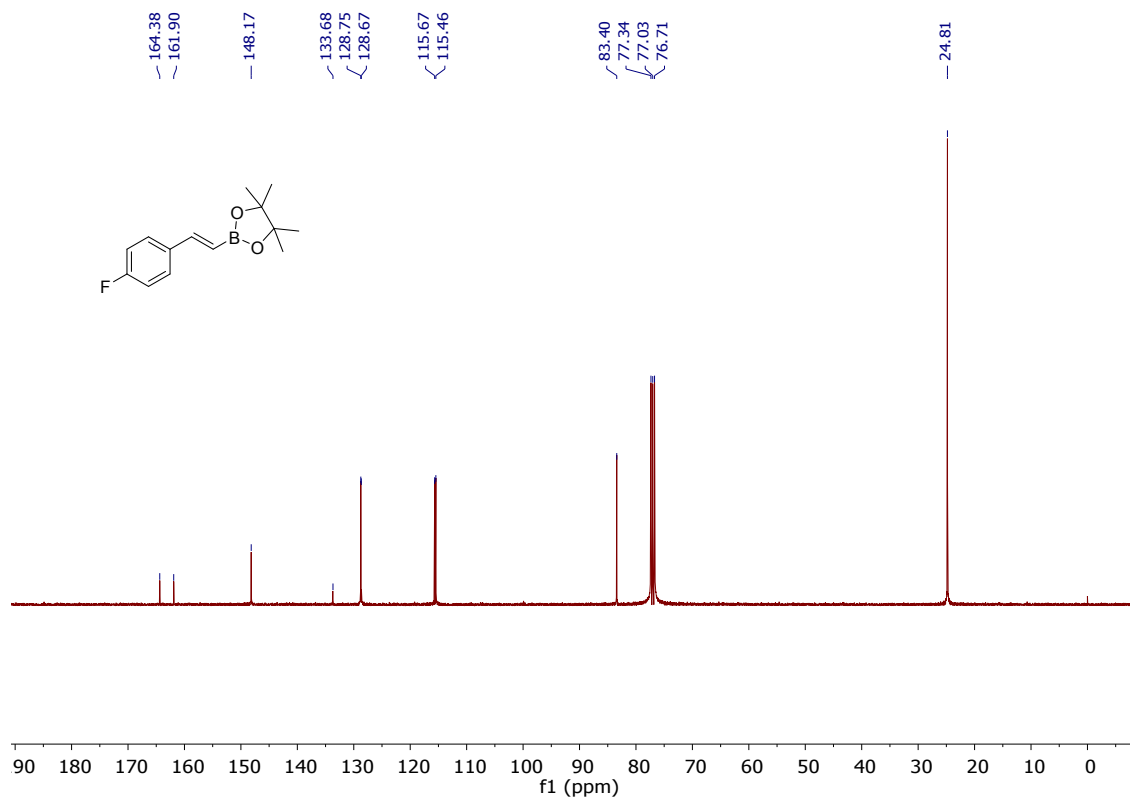

**Figure S14:** <sup>13</sup>C NMR of (*E*)-2-(4-fluorostyryl)-4,4,5,5-tetramethyl-1,3,2-dioxaborolane (**2e**)<sup>1</sup>



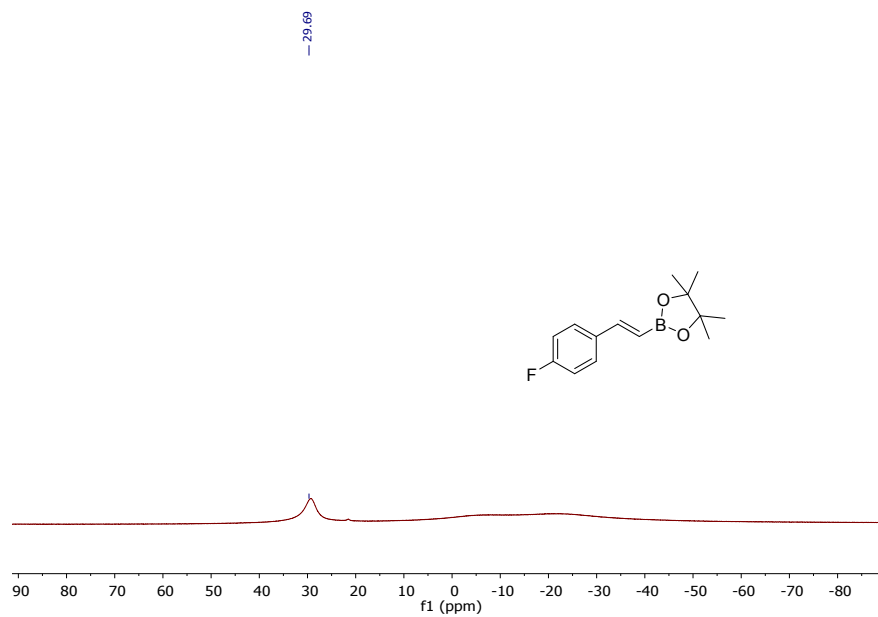

**Figure S15:**  $^{11}\text{B}$  NMR of (*E*)-2-(4-fluorostyryl)-4,4,5,5-tetramethyl-1,3,2-dioxaborolane (**2e**)<sup>12</sup>

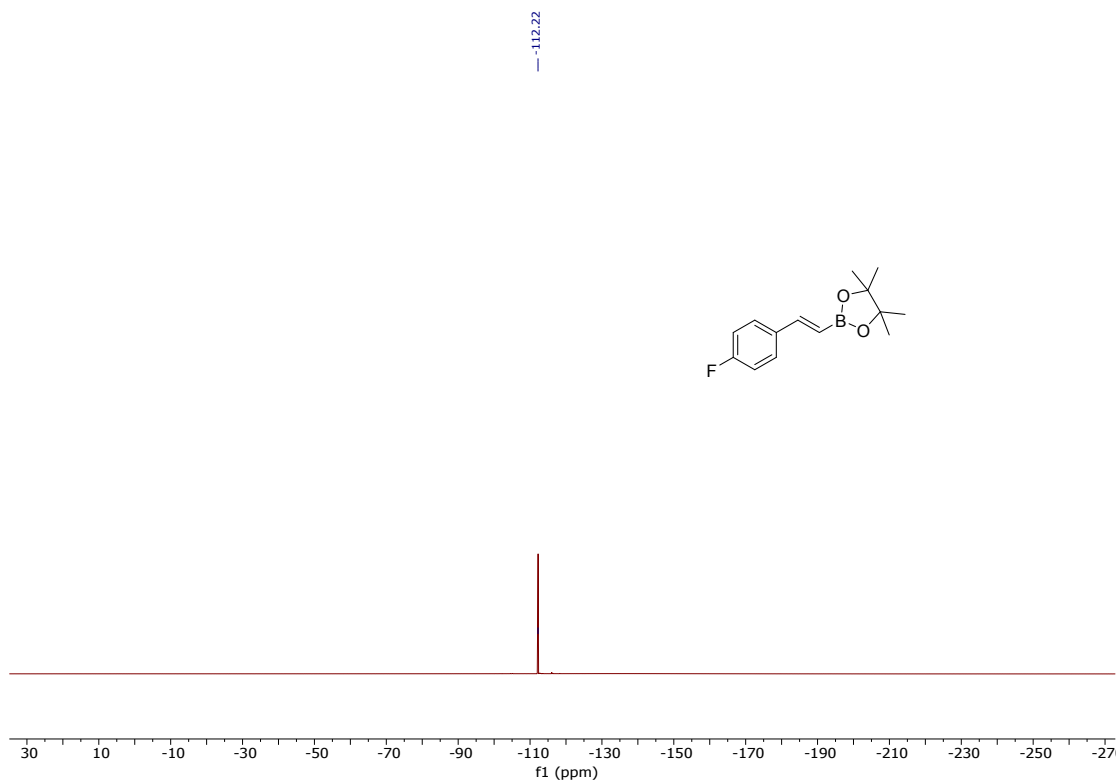

**Figure S16:**  $^{19}\text{F}$  NMR of (*E*)-2-(4-fluorostyryl)-4,4,5,5-tetramethyl-1,3,2-dioxaborolane (**2e**)<sup>12</sup>

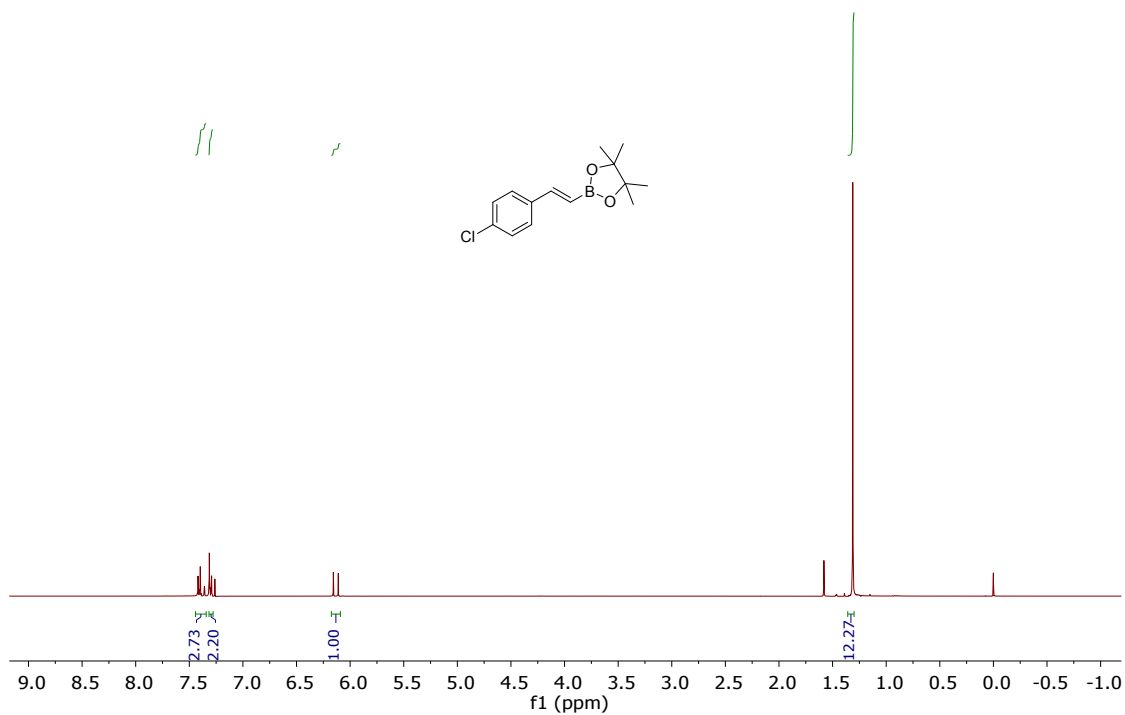

**Figure S17:**  $^1\text{H NMR}$  of (*E*)-2-(4-chlorostyryl)-4,4,5,5-tetramethyl-1,3,2-dioxaborolane (**2f**)<sup>14</sup>

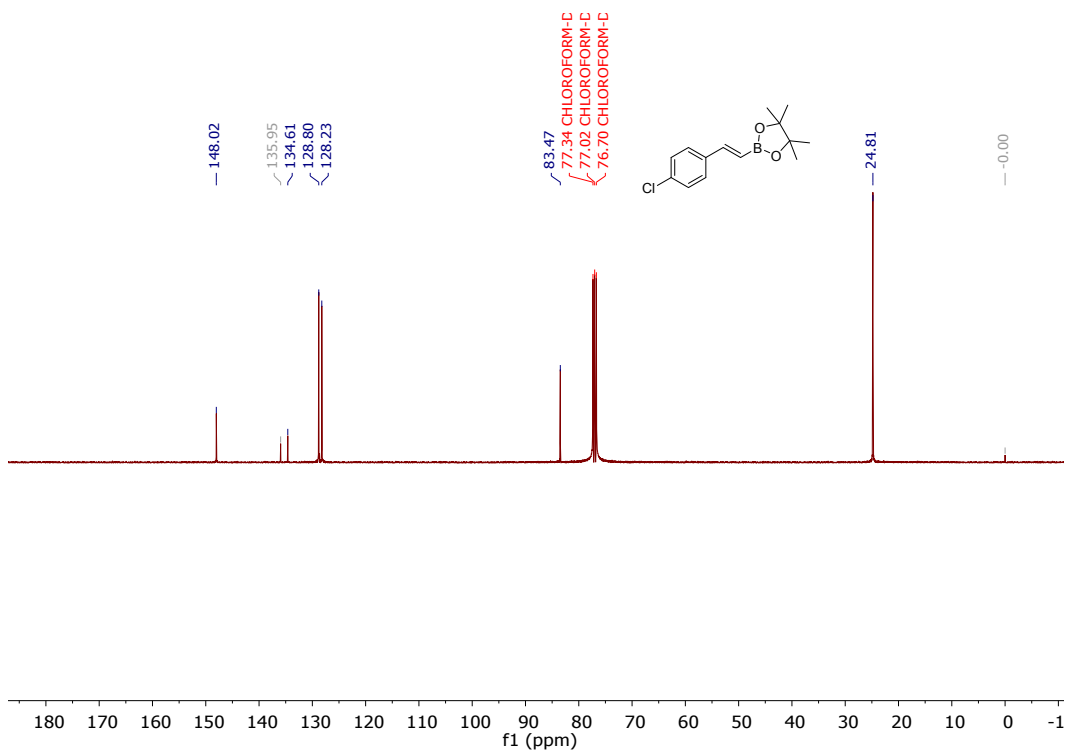

**Figure S18:**  $^{13}\text{C NMR}$  of (*E*)-2-(4-chlorostyryl)-4,4,5,5-tetramethyl-1,3,2-dioxaborolane (**2f**)<sup>14</sup>

- 29.69

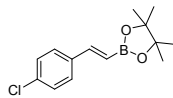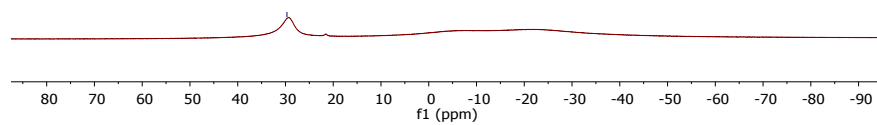

**Figure S19:** <sup>11</sup>B NMR of (*E*)-2-(4-chlorostyryl)-4,4,5,5-tetramethyl-1,3,2-dioxaborolane (**2f**)<sup>13</sup>

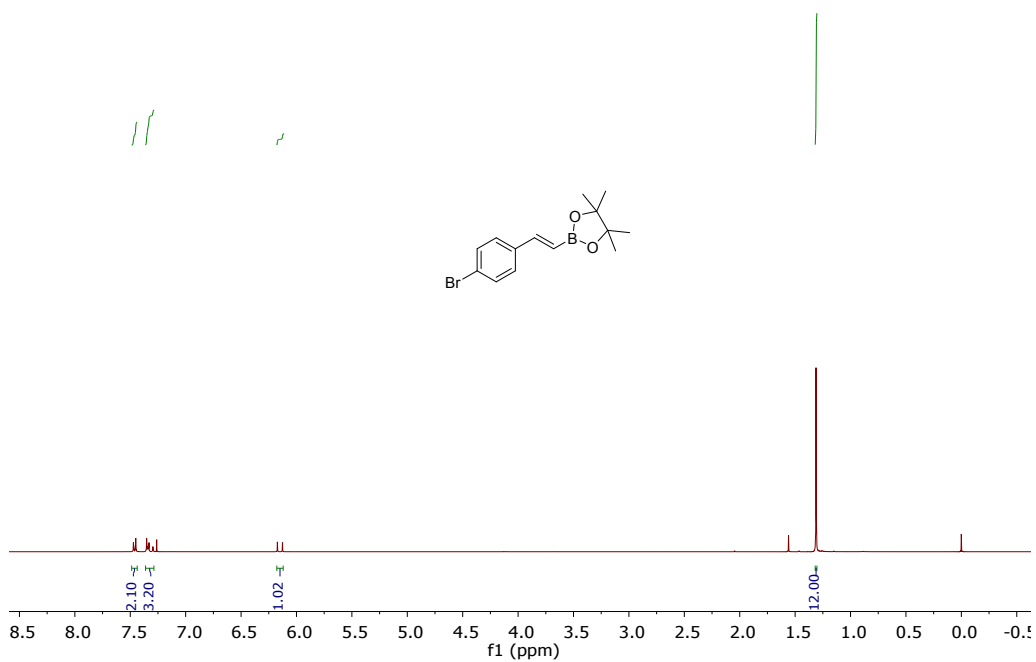

**Figure S20:** <sup>1</sup>H NMR of (*E*)-2-(4-bromostyryl)-4,4,5,5-tetramethyl-1,3,2-dioxaborolane (**2g**)<sup>9</sup>

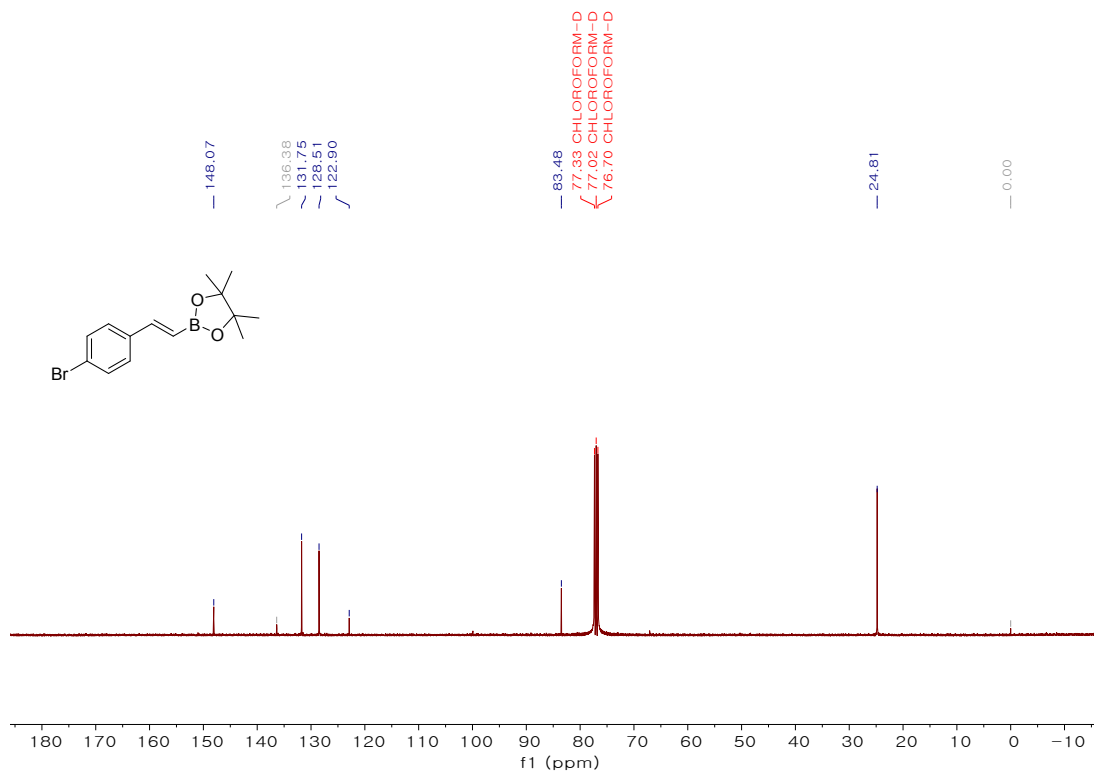

**Figure S21:** <sup>13</sup>C NMR of *(E)*-2-(4-bromostyryl)-4,4,5,5-tetramethyl-1,3,2-dioxaborolane (**2g**)<sup>9</sup>

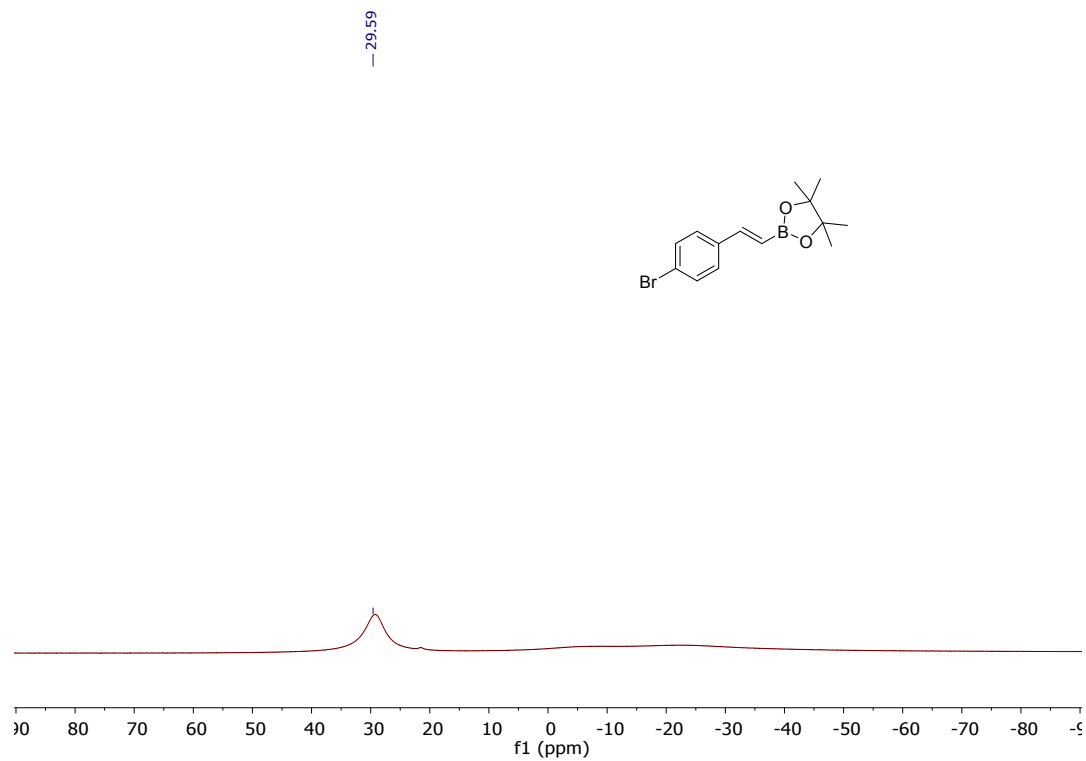

**Figure S22:** <sup>11</sup>B NMR of *(E)*-2-(4-bromostyryl)-4,4,5,5-tetramethyl-1,3,2-dioxaborolane (**2g**)<sup>12</sup>

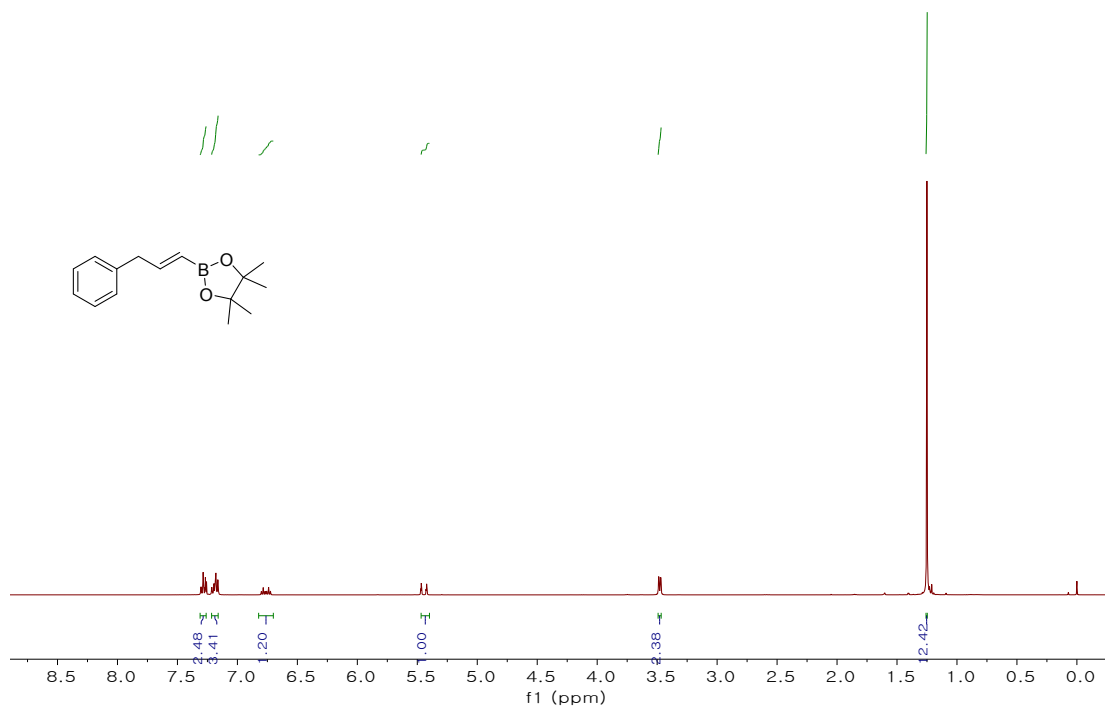

**Figure S23:** <sup>1</sup>H NMR of (*E*)-4,4,5,5-tetramethyl-2-(3-phenylprop-1-en-1-yl)-1,3,2-dioxaborolane (**2h**)<sup>2</sup>

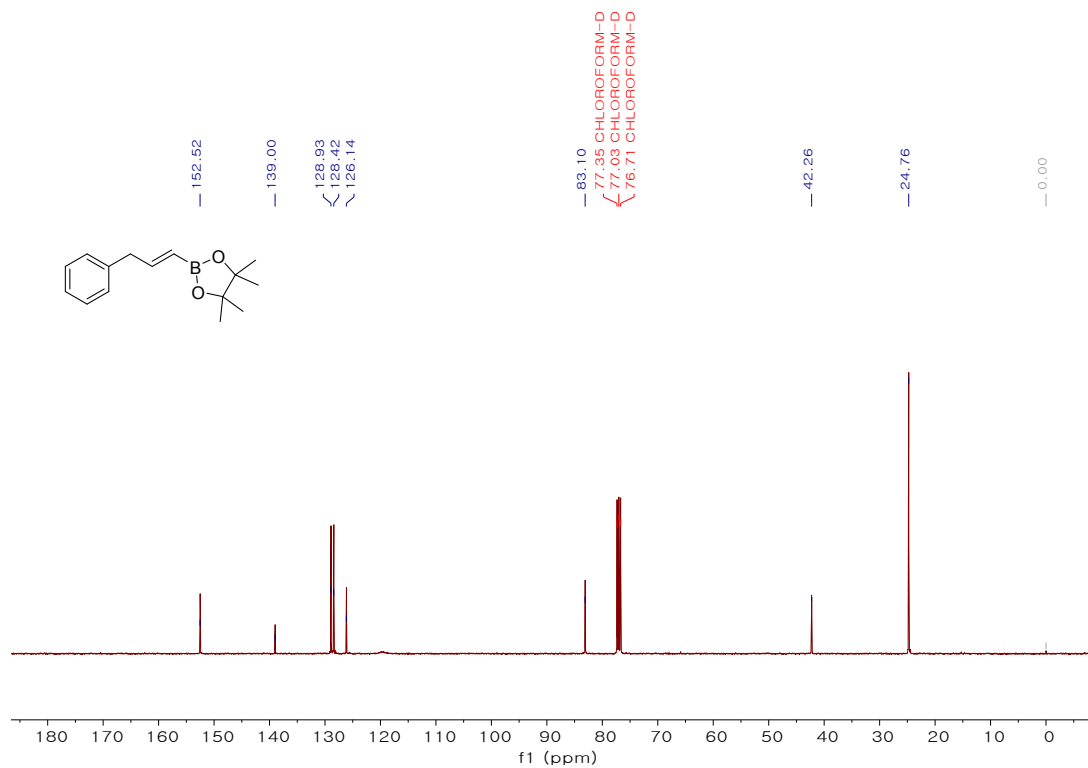

**Figure S24:** <sup>13</sup>C NMR of (*E*)-4,4,5,5-tetramethyl-2-(3-phenylprop-1-en-1-yl)-1,3,2-dioxaborolane (**2h**)<sup>2</sup>

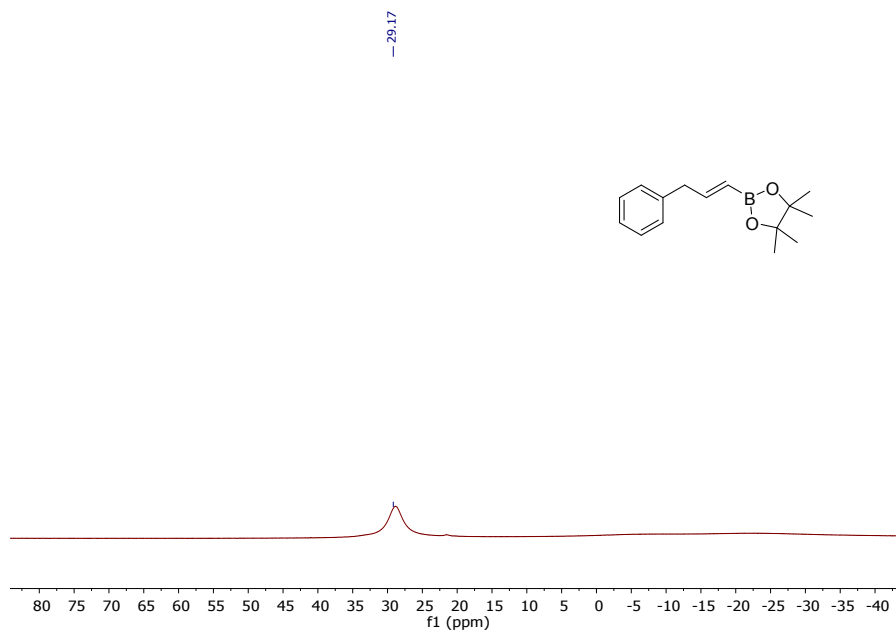

**Figure S25:**  $^{11}\text{B}$  NMR of (*E*)-4,4,5,5-tetramethyl-2-(3-phenylprop-1-en-1-yl)-1,3,2-dioxaborolane (**2h**)

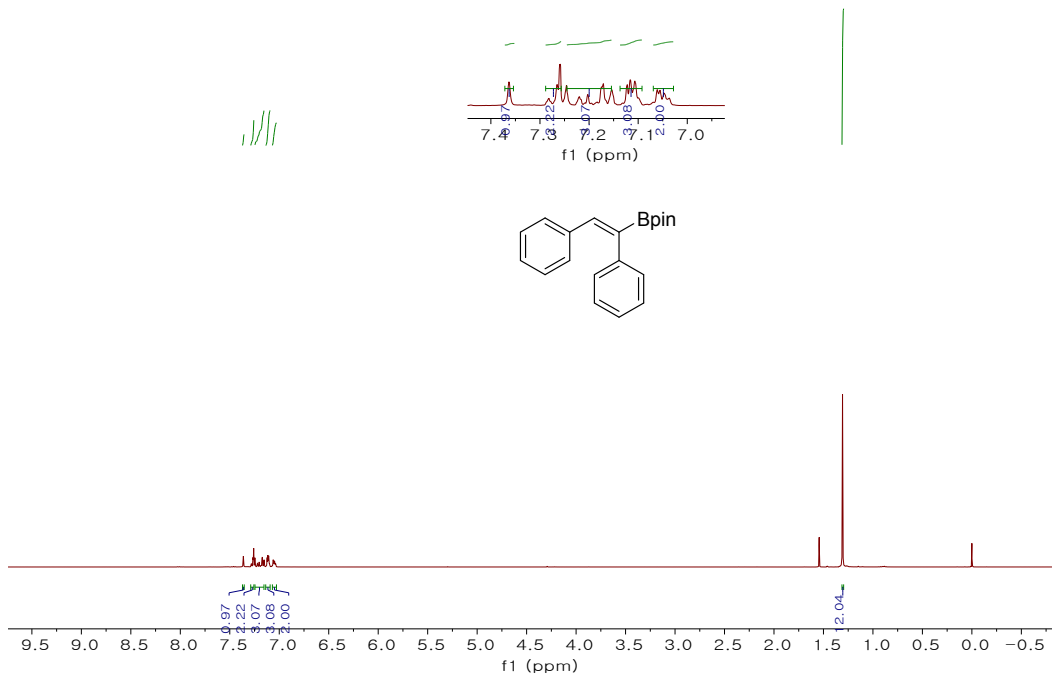

**Figure S26:**  $^1\text{H}$  NMR of (*Z*)-4,4,5,5-Tetramethyl-2-(1,2-diphenyl-1-enyl)-1,3,2-dioxaborolane (**2j**)<sup>1</sup>

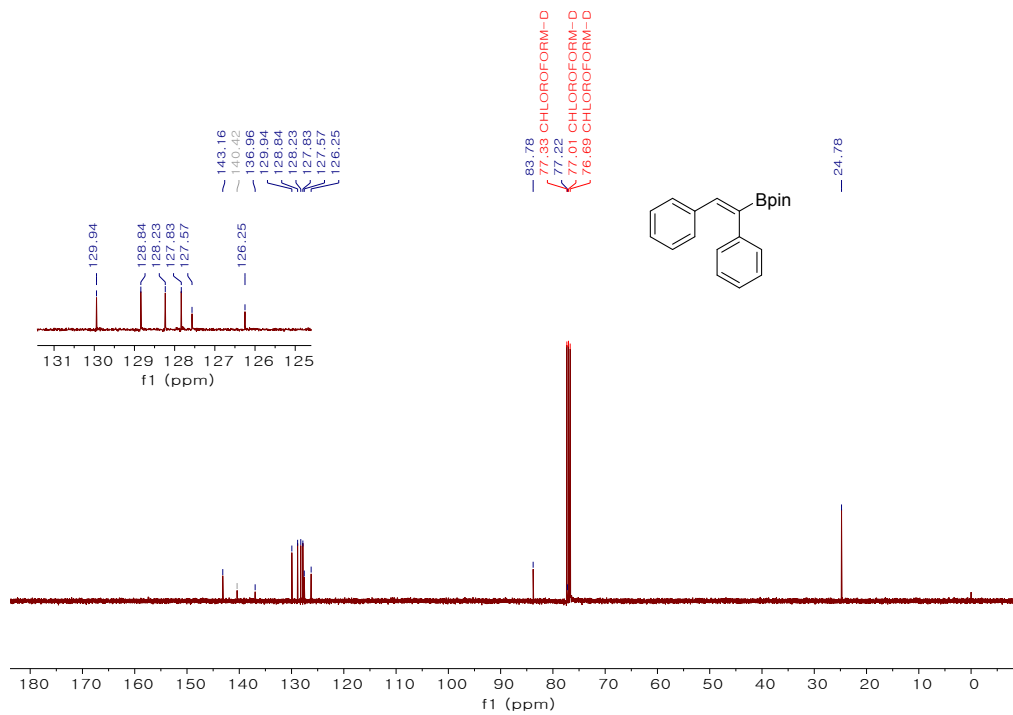

**Figure S27:** <sup>13</sup>C NMR of (Z)-4,4,5,5-Tetramethyl-2-(1,2-diphenyl-1-enyl)-1,3,2-dioxaborolane (**2j**)<sup>1</sup>

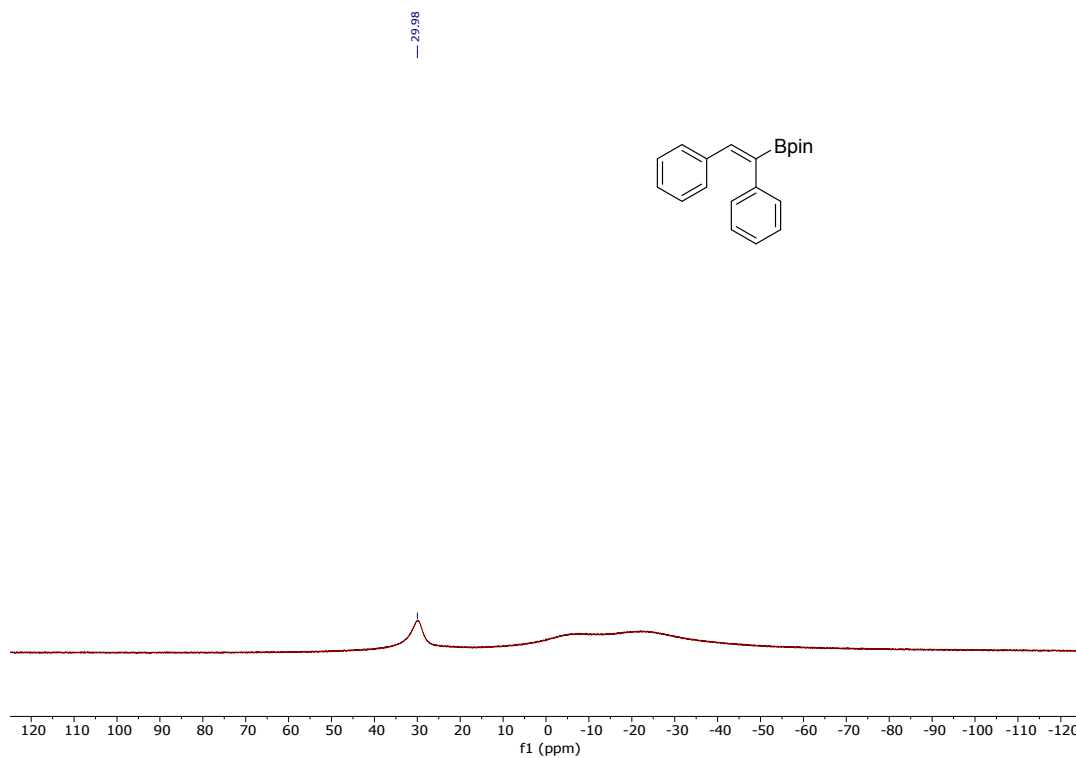

**Figure S28:** <sup>11</sup>B NMR of (Z)-4,4,5,5-Tetramethyl-2-(1,2-diphenyl-1-enyl)-1,3,2-dioxaborolane (**2j**)

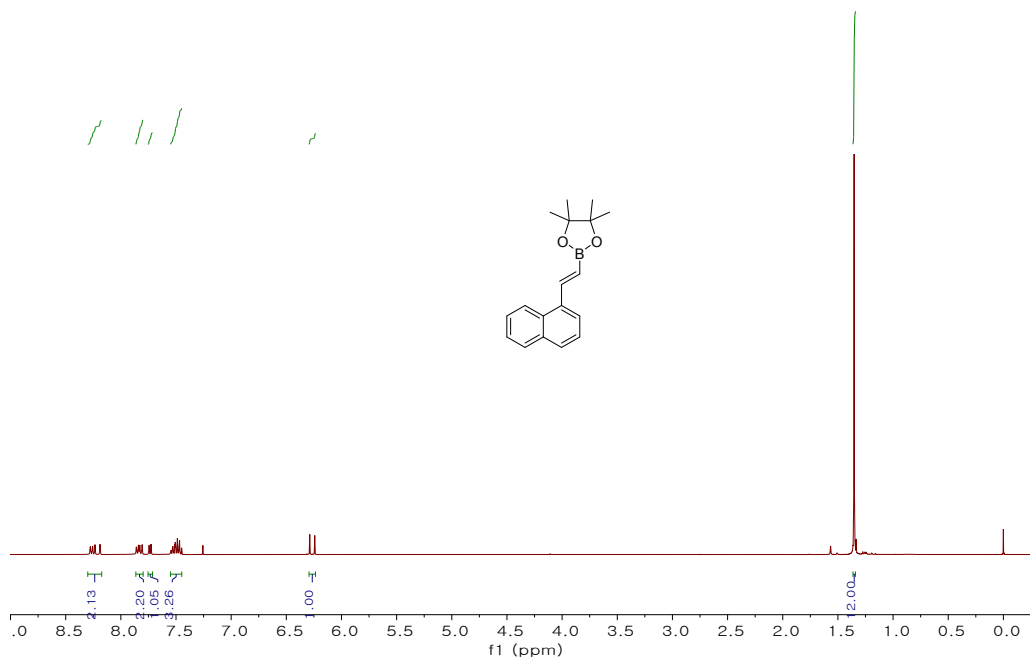

**Figure S29:** <sup>1</sup>H NMR of *(E)*-4,4,5,5-tetramethyl-2-(2-(naphthalen-1-yl)vinyl)-1,3,2-dioxaborolane (**2k**)<sup>6</sup>

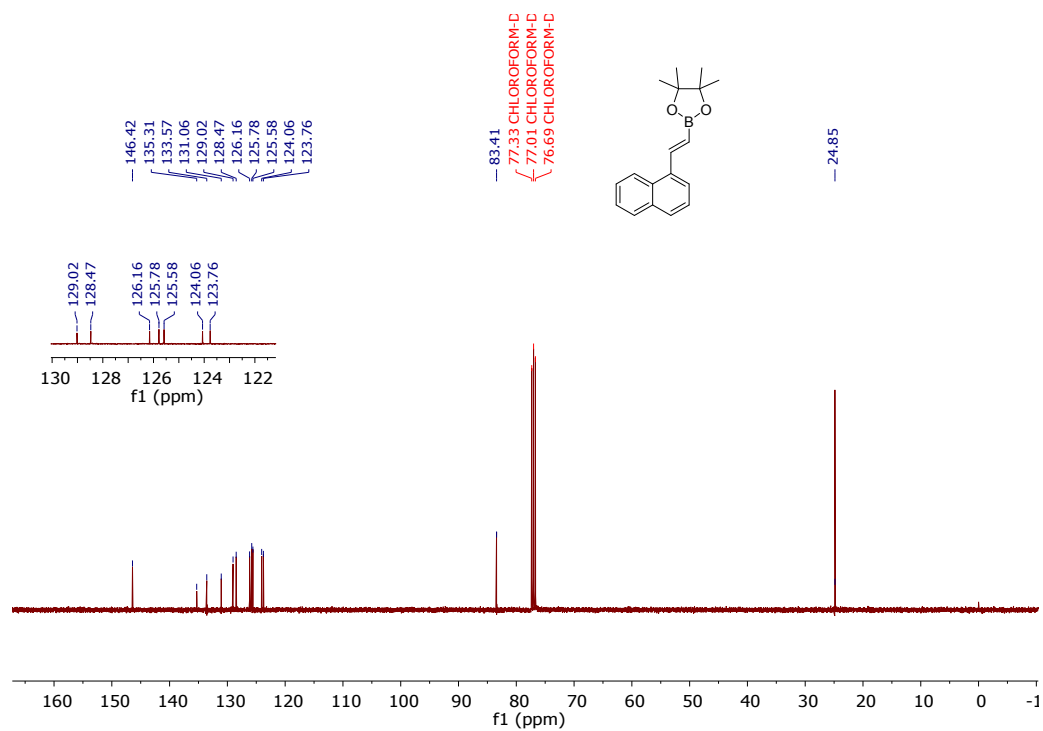

**Figure S30:** <sup>13</sup>C NMR of *(E)*-4,4,5,5-tetramethyl-2-(2-(naphthalen-1-yl)vinyl)-1,3,2-dioxaborolane (**2k**)<sup>6</sup>



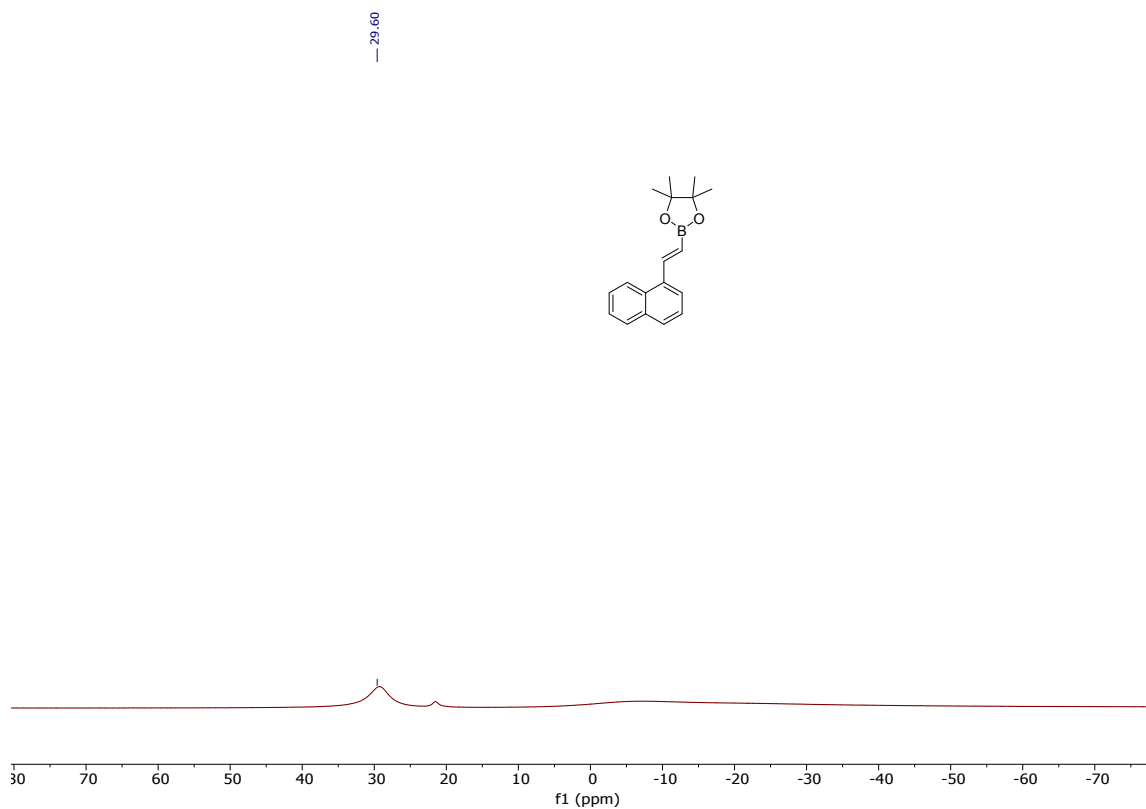

**Figure S31:**  $^{11}\text{B}$  NMR of (*E*)-4,4,5,5-tetramethyl-2-(2-(naphthalen-1-yl)vinyl)-1,3,2-dioxaborolane (**2k**)<sup>6</sup>

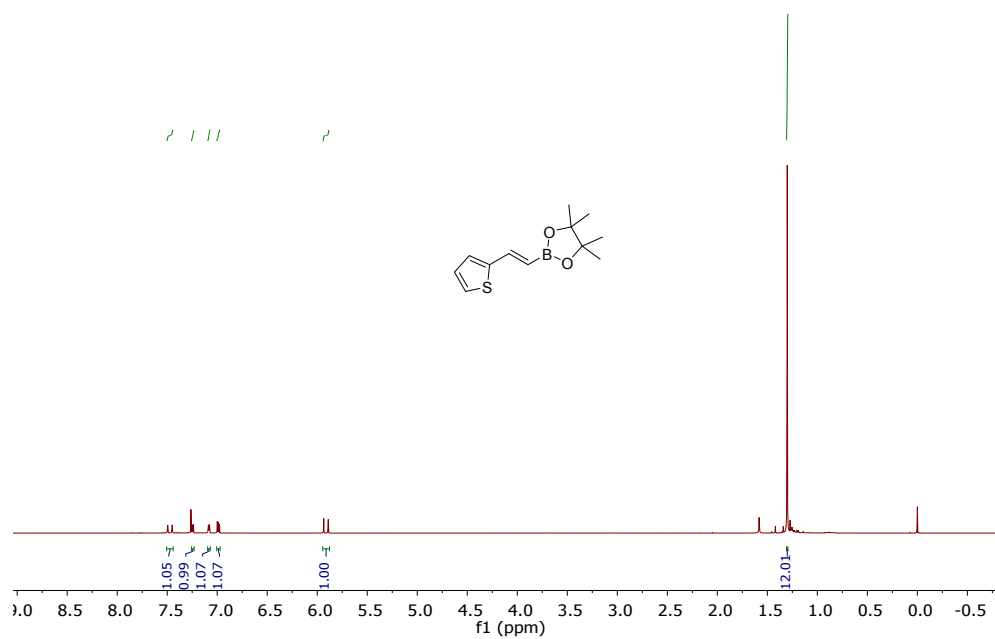

**Figure S32:**  $^1\text{H}$  NMR of (*E*)-4,4,5,5-tetramethyl-2-(2-(thiophen-2-yl)vinyl)-1,3,2-dioxaborolane (**21**)<sup>14</sup>

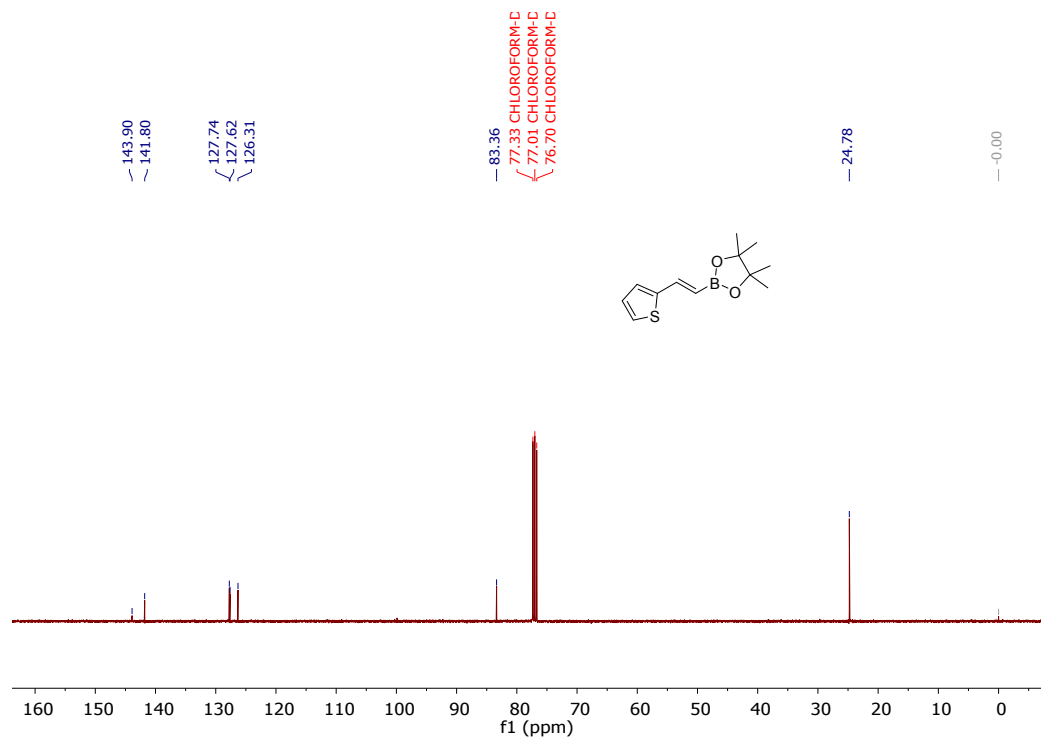

**Figure S33:**  $^{13}\text{C}$  NMR of (*E*)-4,4,5,5-tetramethyl-2-(2-(thiophen-2-yl)vinyl)-1,3,2-dioxaborolane (**21**)<sup>14</sup>

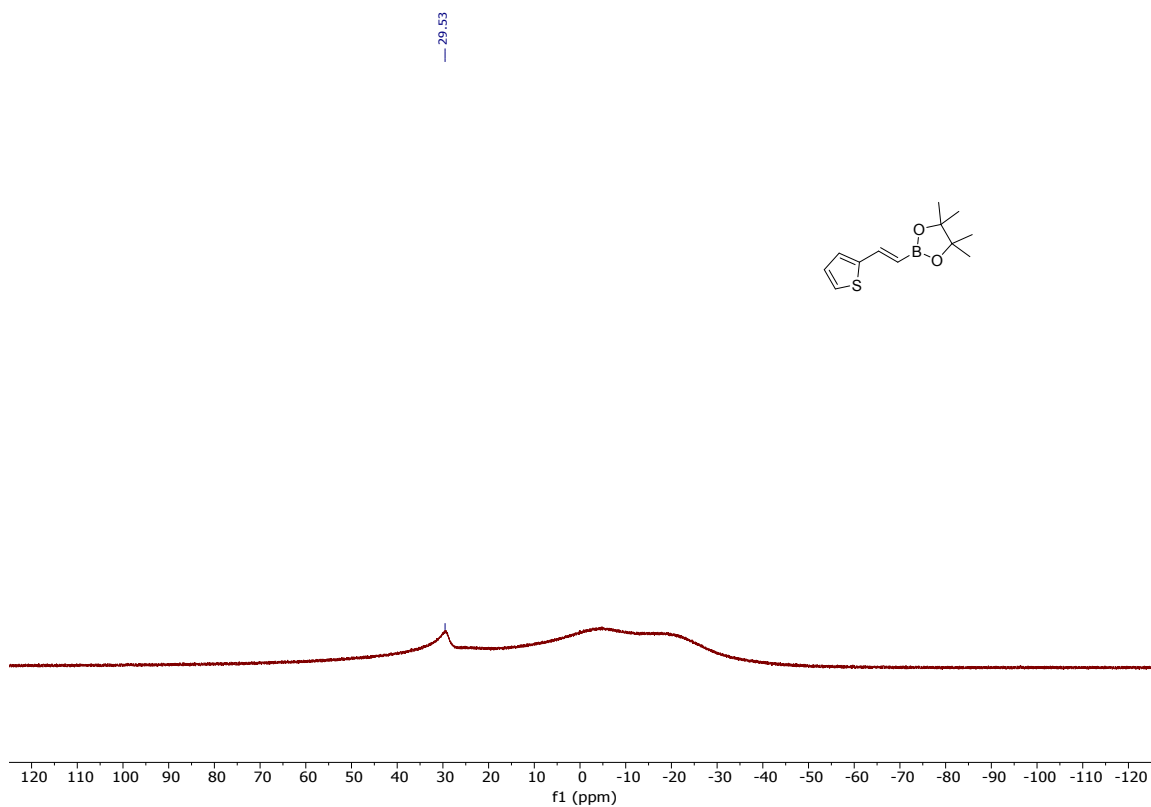

**Figure S34:** (*E*)-4,4,5,5-tetramethyl-2-(2-(thiophen-2-yl)vinyl)-1,3,2-dioxaborolane (**2l**)

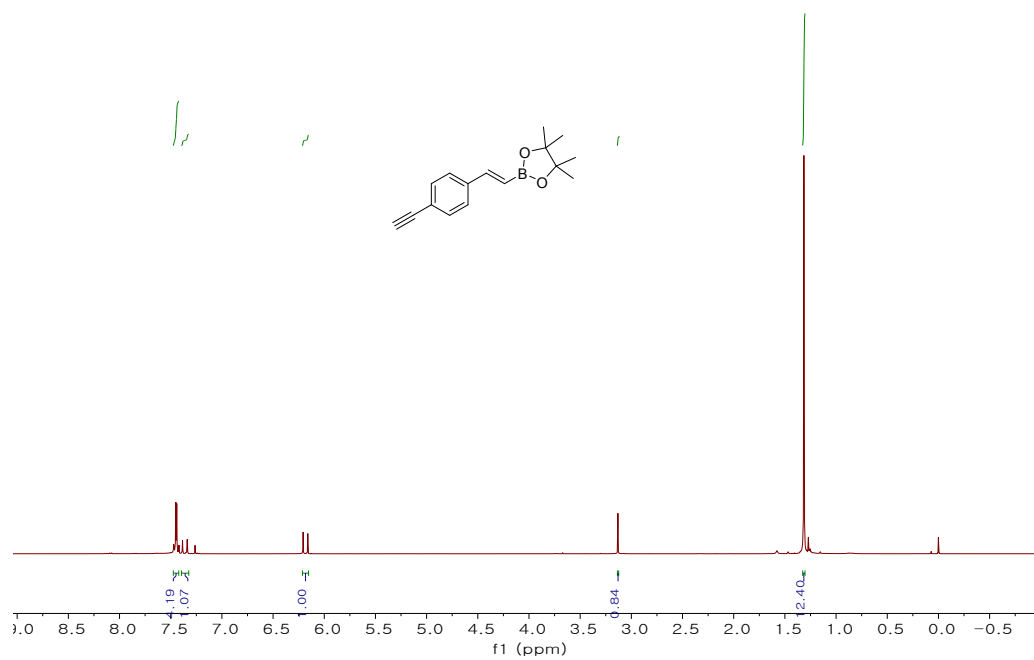

**Figure S35:**  $^1\text{H}$  NMR of (*E*)-2-(4-ethynylstyryl)-4,4,5,5-tetramethyl-1,3,2-dioxaborolane (**2m**)<sup>12</sup>

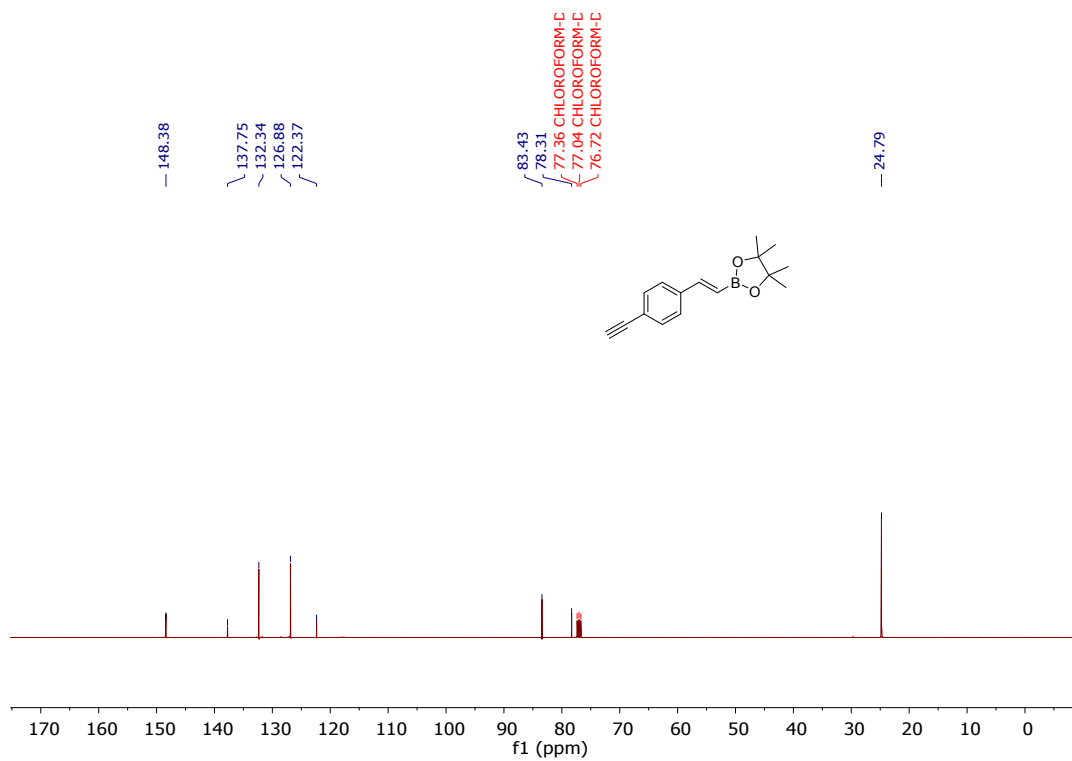

**Figure S36:** <sup>13</sup>C NMR of (*E*)-2-(4-ethynylstyryl)-4,4,5,5-tetramethyl-1,3,2-dioxaborolane (**2m**)<sup>12</sup>

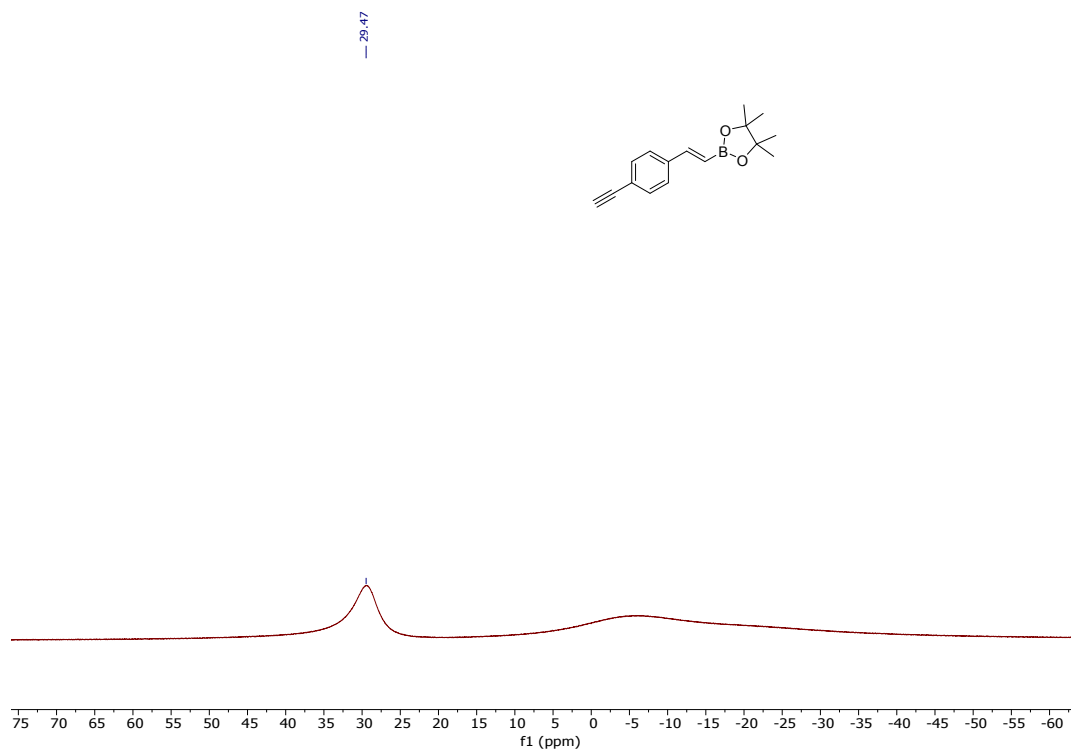

**Figure S37:**  $^{11}\text{B}$  NMR of (*E*)-2-(4-ethynylstyryl)-4,4,5,5-tetramethyl-1,3,2-dioxaborolane (**2m**)<sup>12</sup>

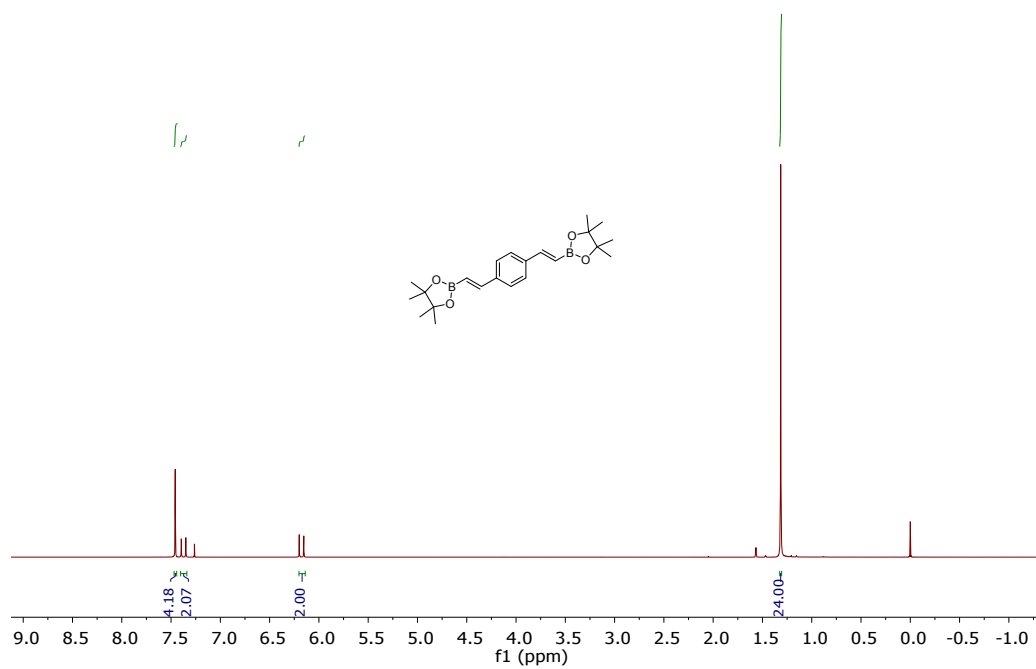

**Figure S38:**  $^1\text{H}$  NMR of 1,4-bis((*E*)-2-(4,4,5,5-tetramethyl-1,3,2-dioxaborolan-2-yl)vinyl)benzene (**2n**)<sup>12</sup>

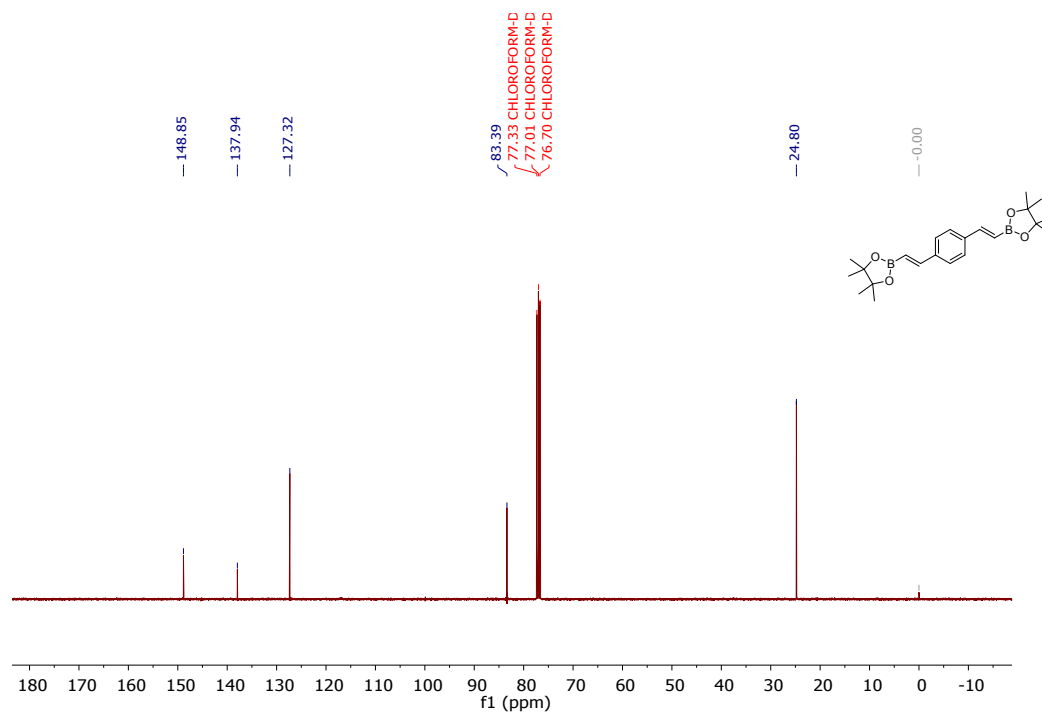

**Figure S39:**  $^{13}\text{C}$  NMR of 1,4-bis(*E*)-2-(4,4,5,5-tetramethyl-1,3,2-dioxaborolan-2-yl)vinyl)benzene (**2n**)<sup>12</sup>

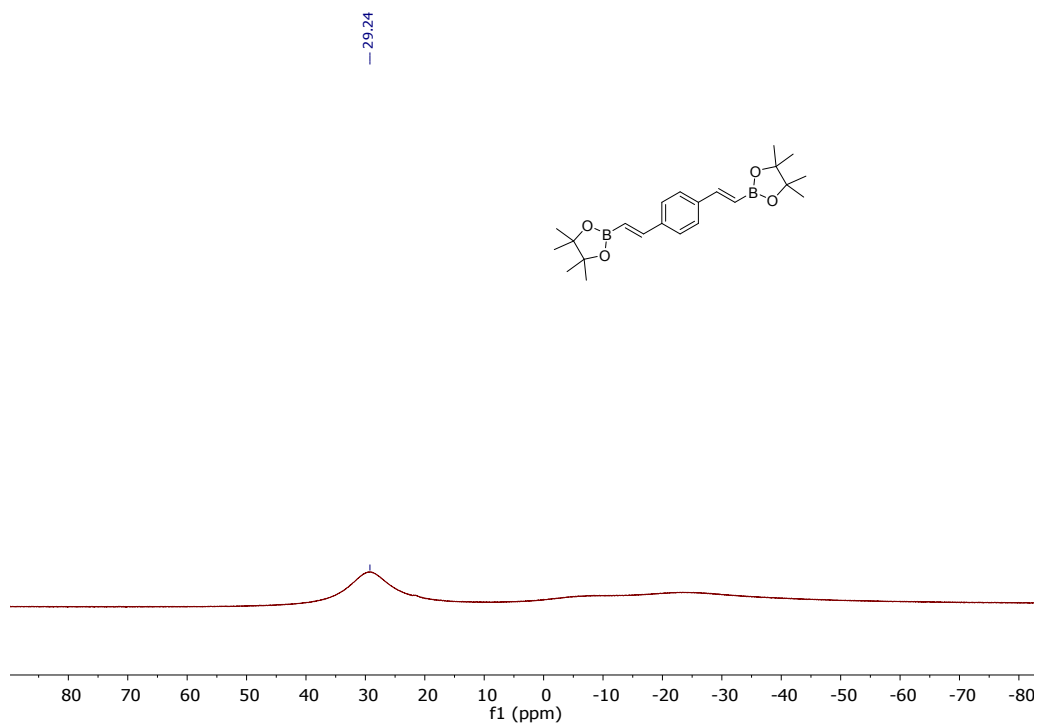

**Figure S40:**  $^{11}\text{B}$  NMR of 1,4-bis(*E*)-2-(4,4,5,5-tetramethyl-1,3,2-dioxaborolan-2-yl)vinyl)benzene (**2n**)<sup>12</sup>

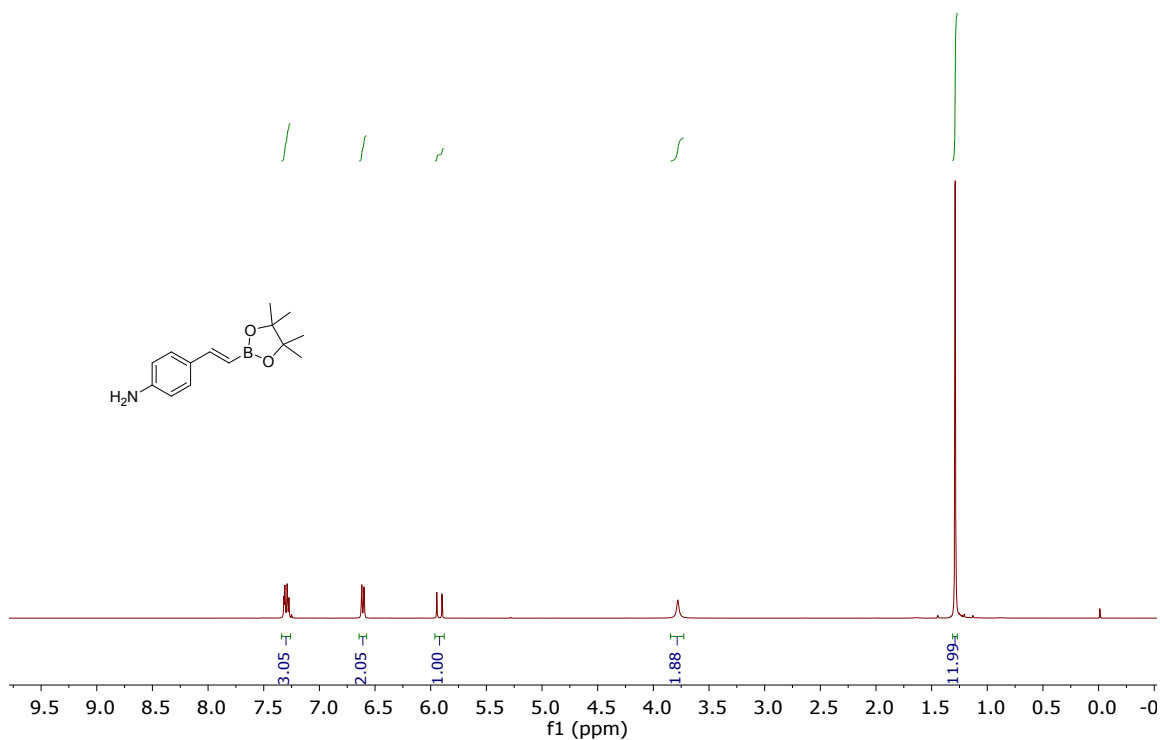

**Figure S41:**  $^1\text{H}$  NMR of *(E)*-4-(2-(4,4,5,5-tetramethyl-1,3,2-dioxaborolan-2-yl)vinyl)aniline (**2o**)<sup>14</sup>

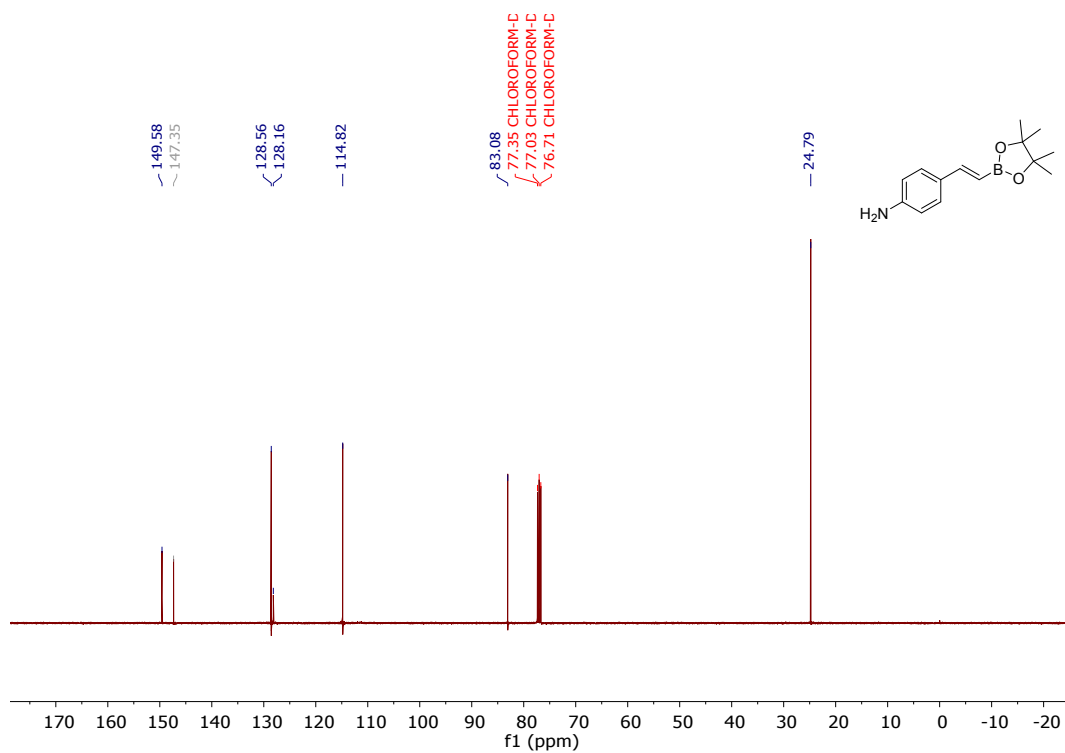

**Figure S42:**  $^{13}\text{C}$  NMR of *(E)*-4-(2-(4,4,5,5-tetramethyl-1,3,2-dioxaborolan-2-yl)vinyl)aniline (**2o**)<sup>14</sup>

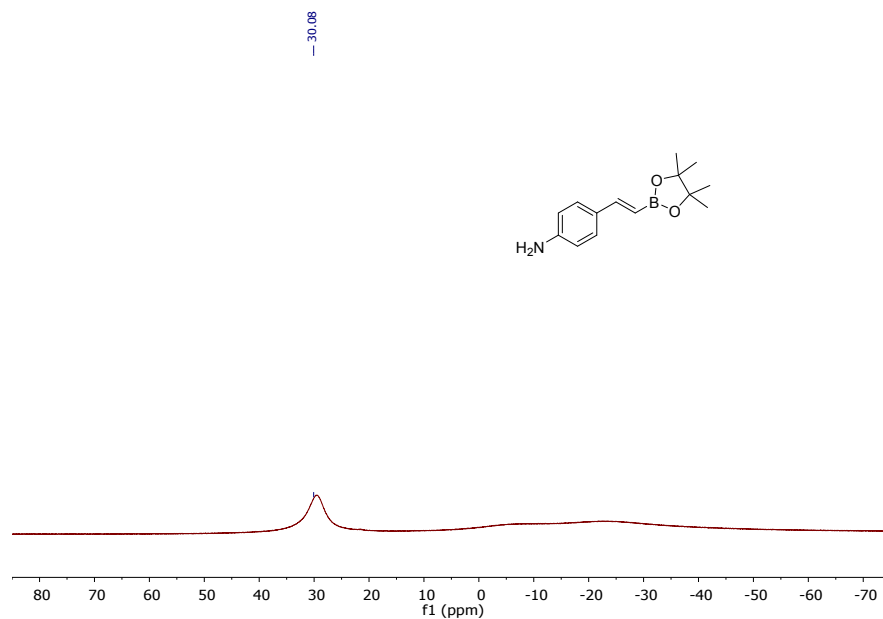

**Figure S43:**  $^{11}\text{B}$  NMR of (*E*)-4-(2-(4,4,5,5-tetramethyl-1,3,2-dioxaborolan-2-yl)vinyl)aniline (**2o**)<sup>14</sup>

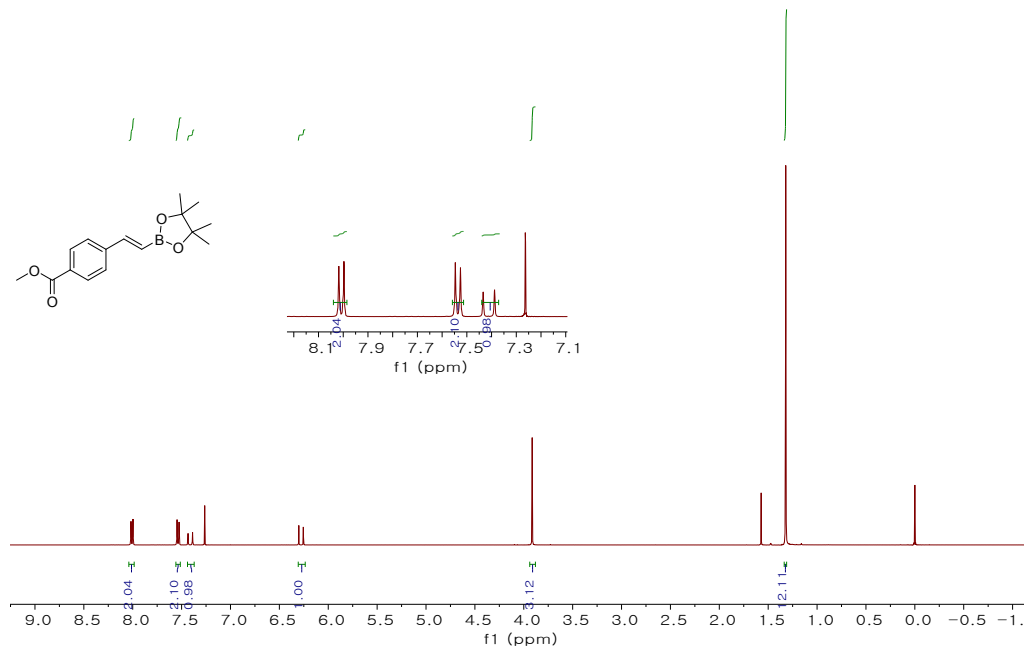

**Figure S44:**  $^1\text{H}$  NMR of methyl (*E*)-4-(2-(4,4,5,5-tetramethyl-1,3,2-dioxaborolan-2-yl)vinyl)benzoate (**2p**)<sup>6</sup>



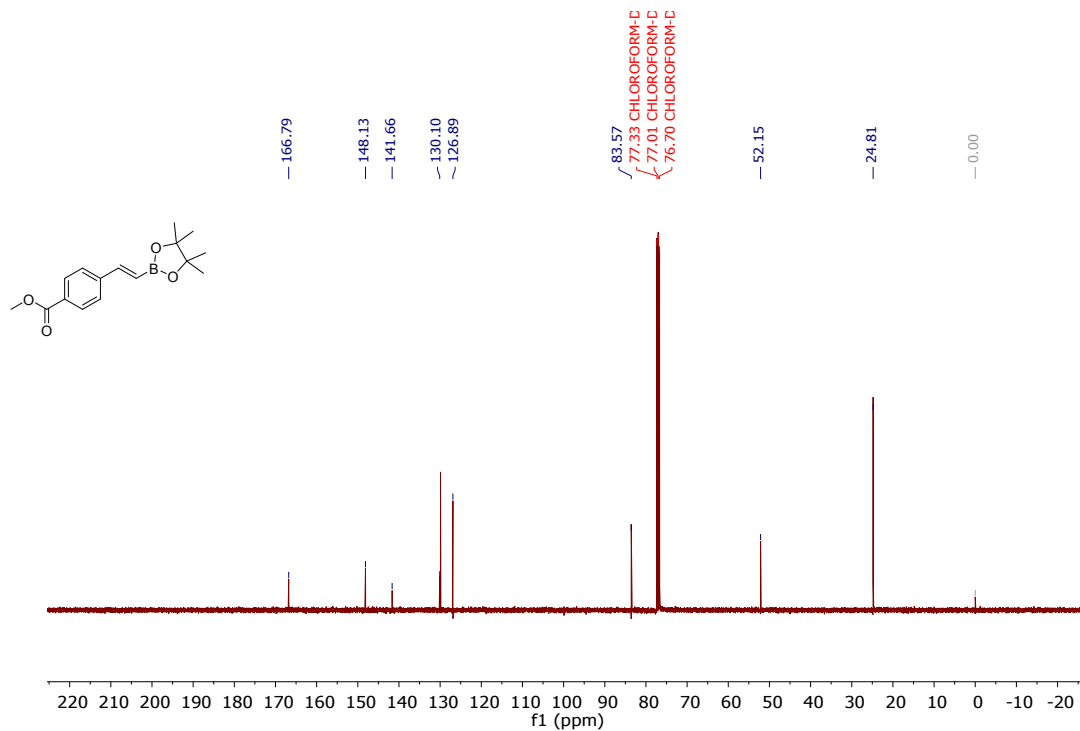

**Figure S45:** <sup>13</sup>C NMR of *(E)*-4-(2-(4,4,5,5-tetramethyl-1,3,2-dioxaborolan-2-yl)vinyl)benzoate (**2p**)<sup>6</sup>

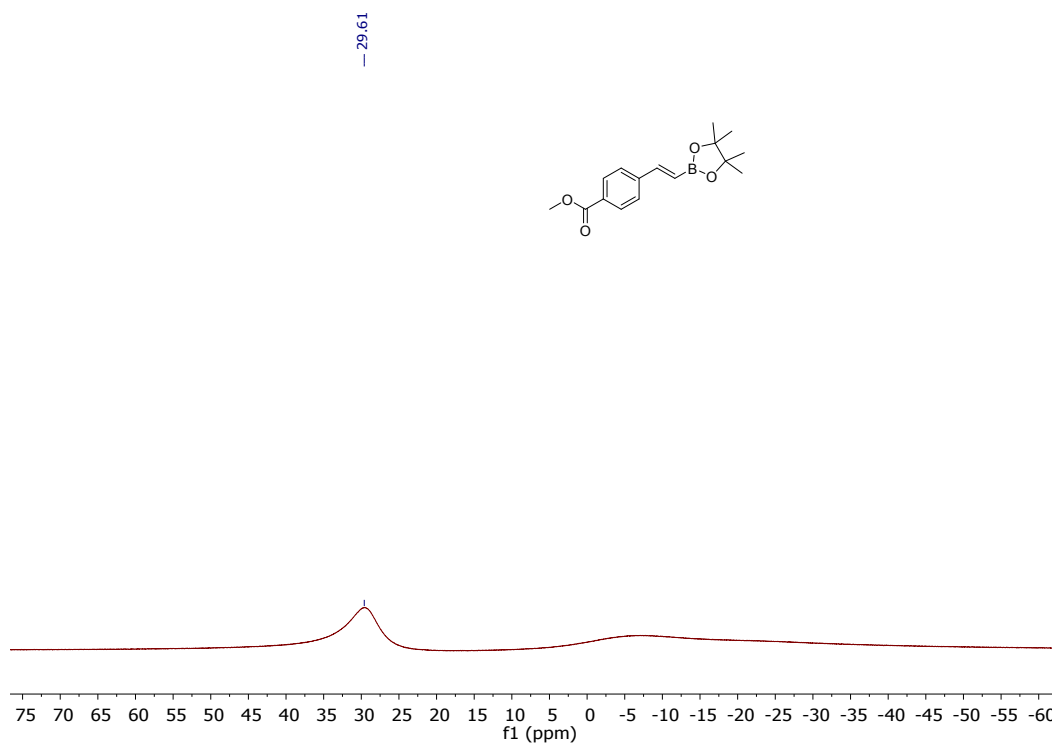

**Figure S46:** <sup>11</sup>B NMR of *(E)*-4-(2-(4,4,5,5-tetramethyl-1,3,2-dioxaborolan-2-yl)vinyl)benzoate (**2p**)<sup>6</sup>

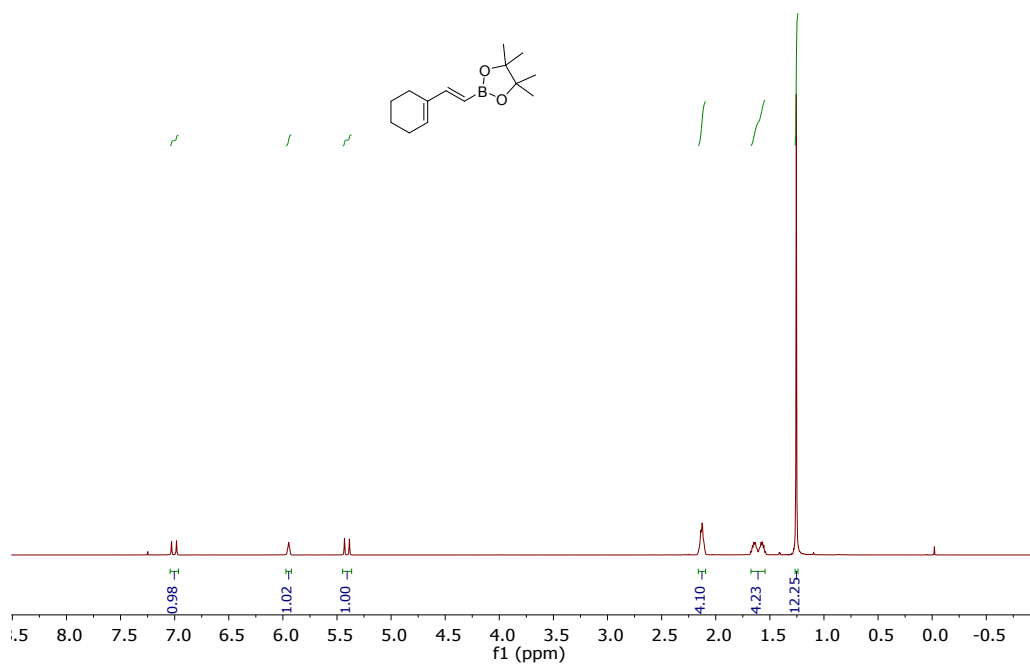

**Figure S47:**  $^1\text{H}$  NMR of (*E*)-2-(2-(cyclohex-1-en-1-yl)vinyl)-4,4,5,5-tetramethyl-1,3,2-dioxaborolane (**2q**)<sup>7</sup>

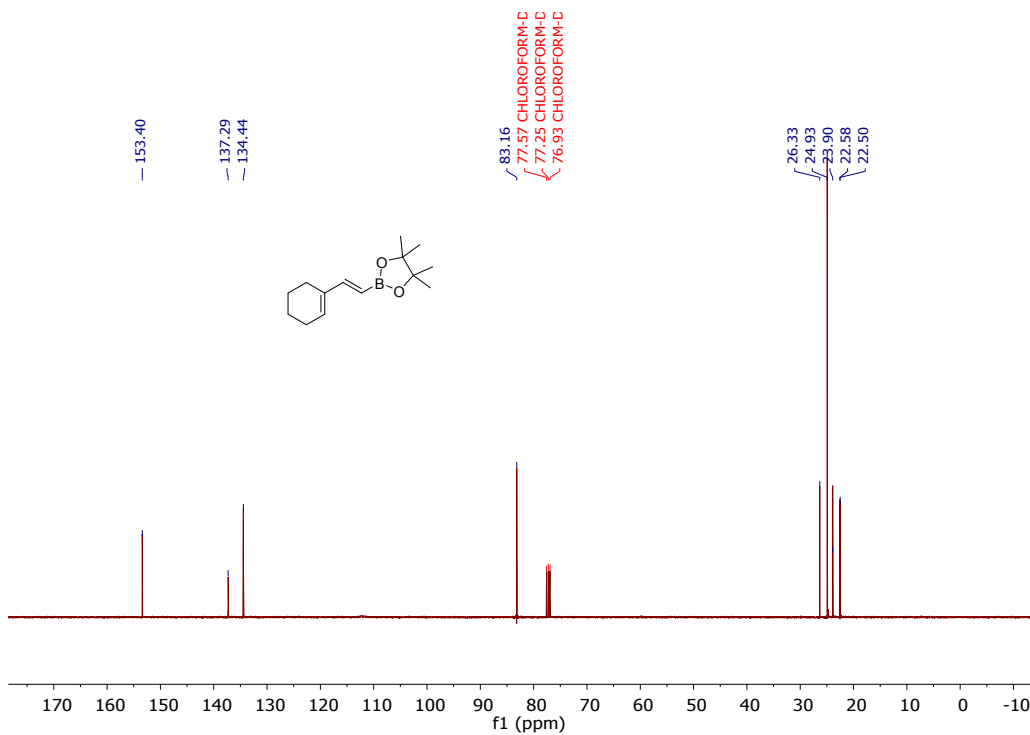

**Figure S48:**  $^{13}\text{C}$  NMR of (*E*)-2-(2-(cyclohex-1-en-1-yl)vinyl)-4,4,5,5-tetramethyl-1,3,2-dioxaborolane (**2q**)<sup>7</sup>

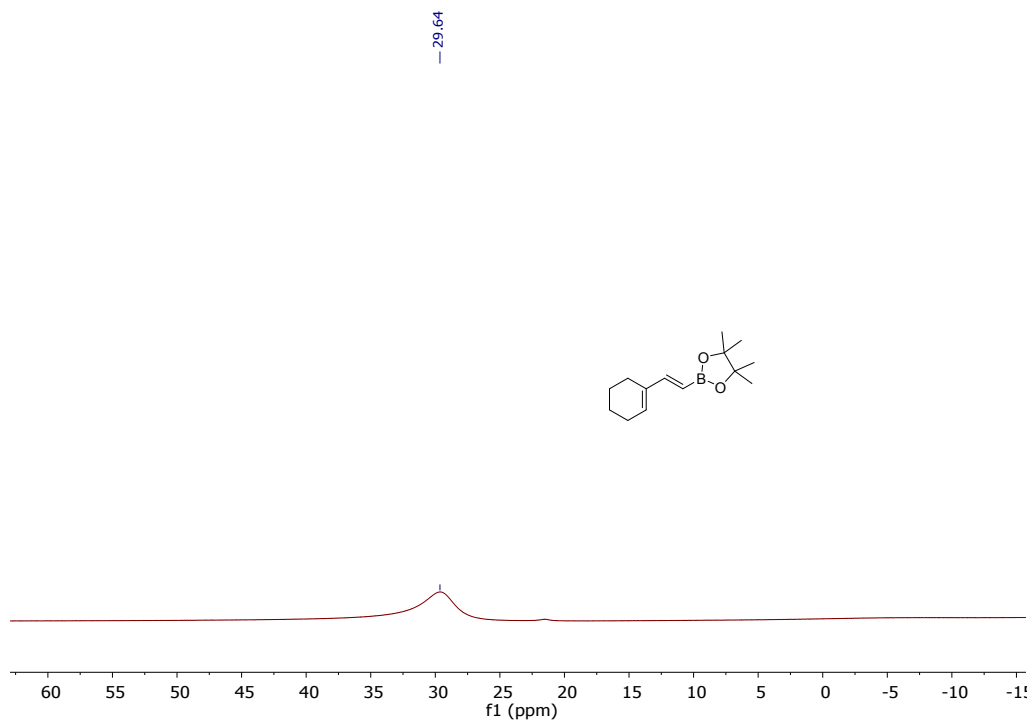

**Figure S49:**  $^{11}\text{B}$  NMR of (*E*)-2-(2-(cyclohex-1-en-1-yl)vinyl)-4,4,5,5-tetramethyl-1,3,2-dioxaborolane (**2q**)<sup>7</sup>

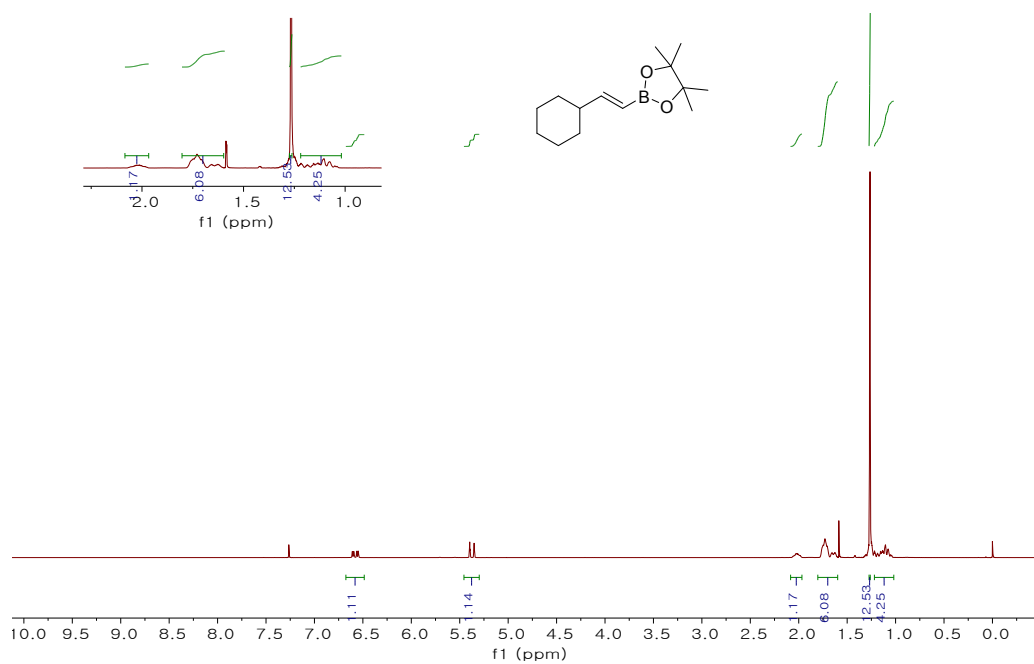

**Figure S50:**  $^1\text{H}$  NMR of (*E*)-2-(2-(cyclohexyl)vinyl)-4,4,5,5-tetramethyl-1,3,2-dioxaborolane (**2r**)<sup>4</sup>

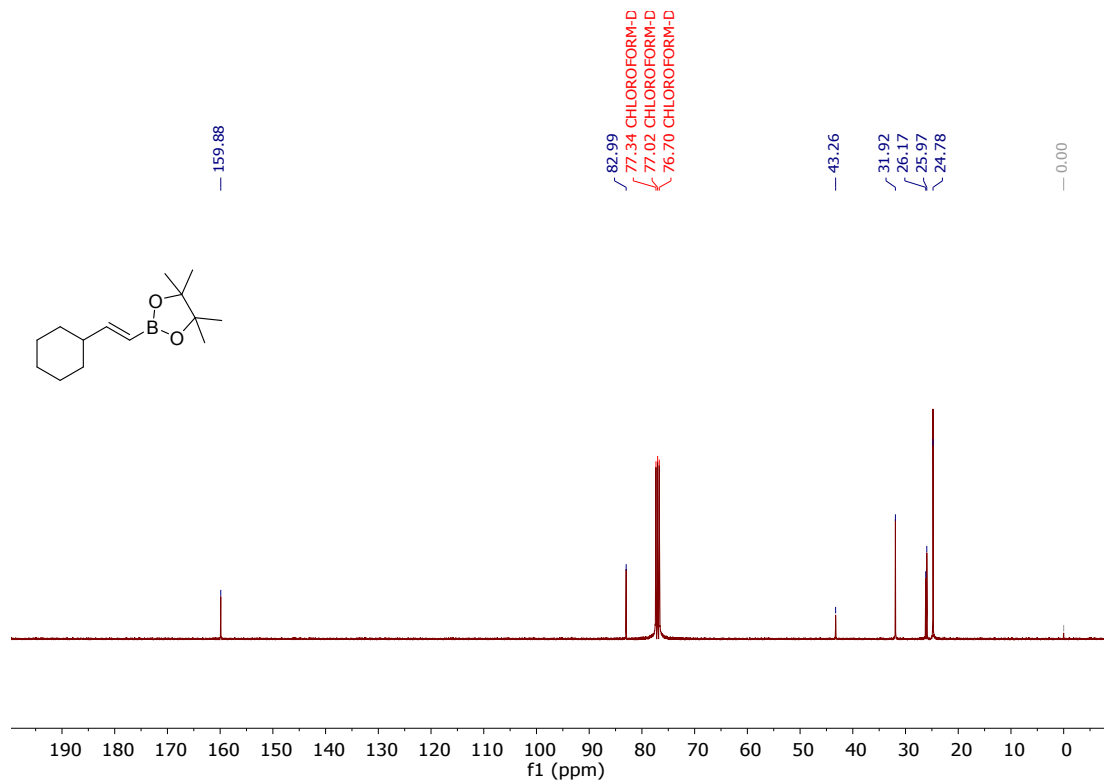

**Figure S51:**  $^{13}\text{C}$  NMR of (*E*)-2-(2-cyclohexylvinyl)-4,4,5,5-tetramethyl-1,3,2-dioxaborolane (**2r**)<sup>4</sup>

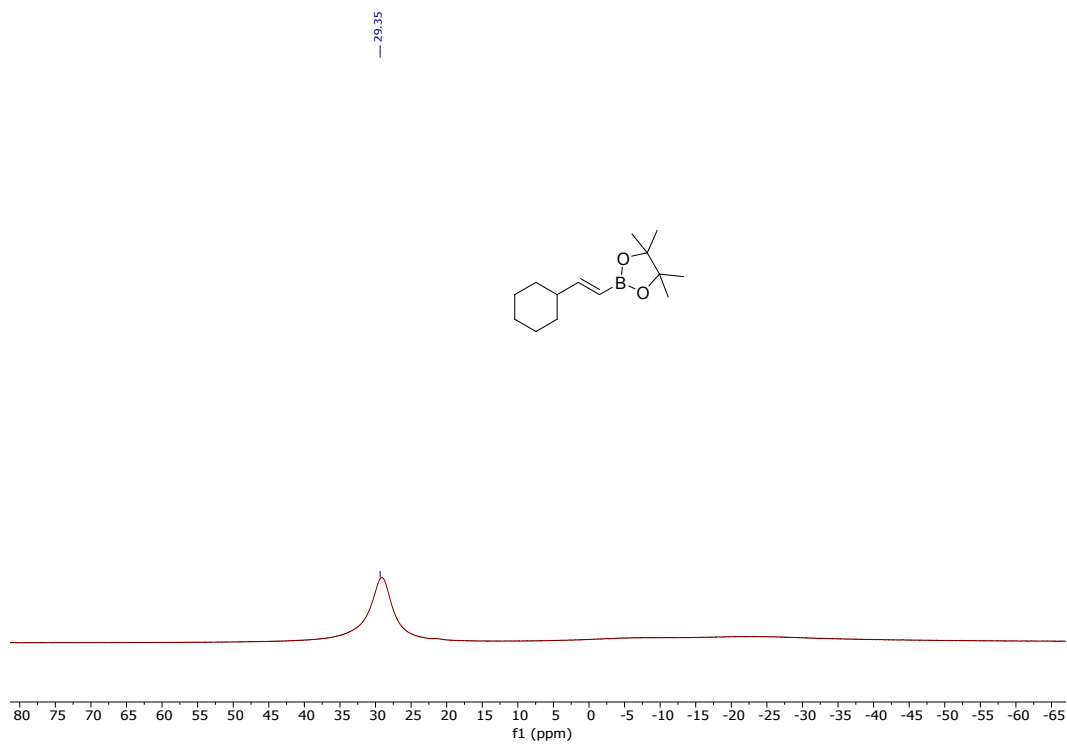

**Figure S52:**  $^{11}\text{B}$  NMR of (*E*)-2-(2-cyclohexylvinyl)-4,4,5,5-tetramethyl-1,3,2-dioxaborolane (**2r**)<sup>4</sup>

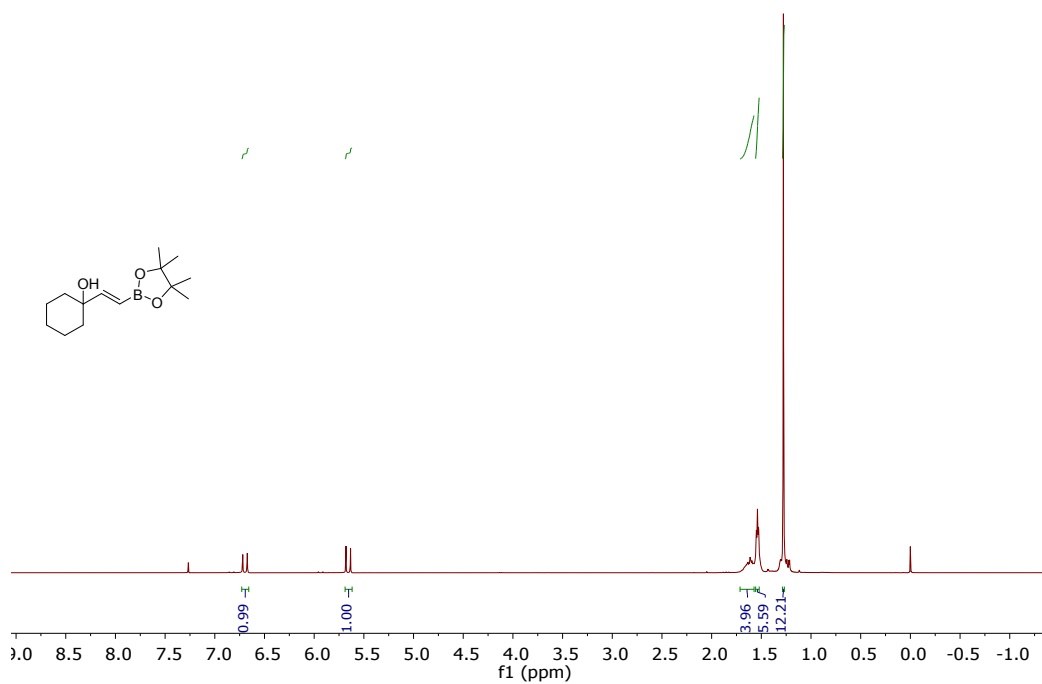

**Figure S53:** <sup>1</sup>H NMR of *(E)*-1-(2-(4,4,5,5-tetramethyl-1,3,2-dioxaborolan-2-yl)vinyl)cyclohexan-1-ol (**2s**)<sup>7</sup>

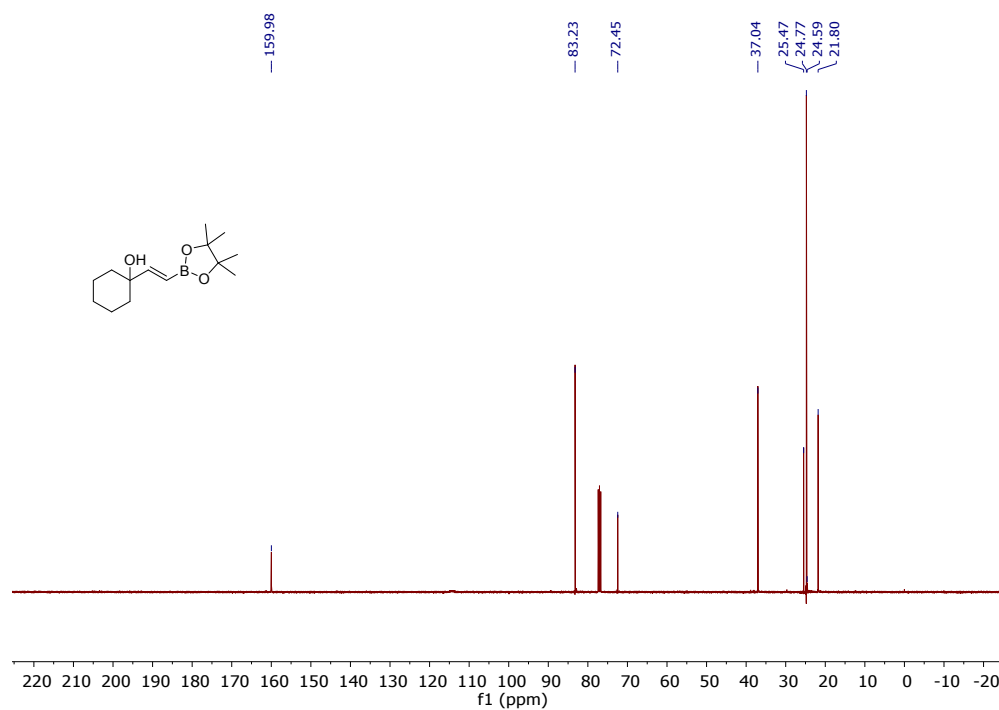

**Figure S54:** <sup>13</sup>C NMR of *(E)*-1-(2-(4,4,5,5-tetramethyl-1,3,2-dioxaborolan-2-yl)vinyl)cyclohexan-1-ol (**2s**)<sup>7</sup>

- 29.37

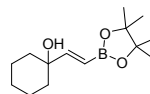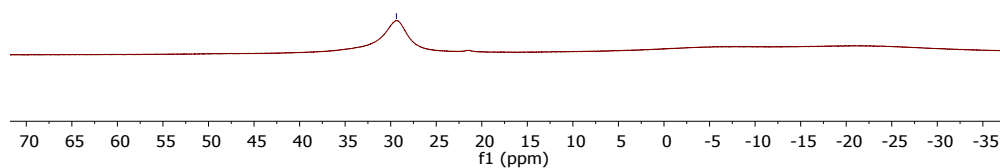

**Figure S55:**  $^{11}\text{B}$  NMR of (*E*)-1-(2-(4,4,5,5-tetramethyl-1,3,2-dioxaborolan-2-yl)vinyl)cyclohexan-1-ol (**2s**)<sup>7</sup>

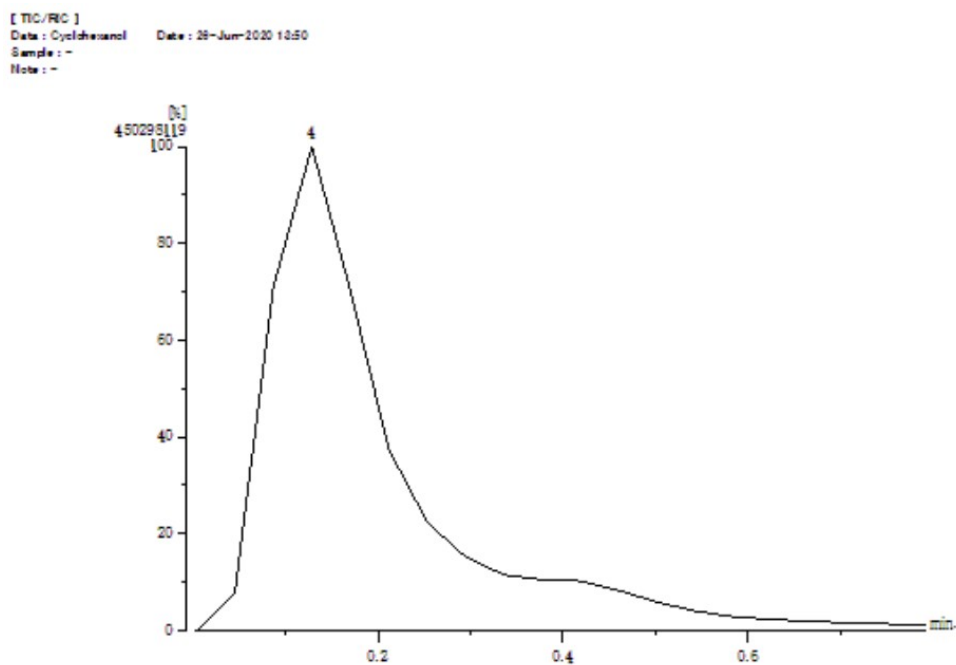

**Figure S56:** Mass Spectrum of (*E*)-1-(2-(4,4,5,5-tetramethyl-1,3,2-dioxaborolan-2-yl)vinyl)cyclohexan-1-ol (**2s**)<sup>7</sup>

[ Mass Spectrum ]  
Data : Cyclohexanol Date : 26-Jun-2020 13:50  
RT: 0.17 min Scan#: 5-K(13.20) (4-1.0)

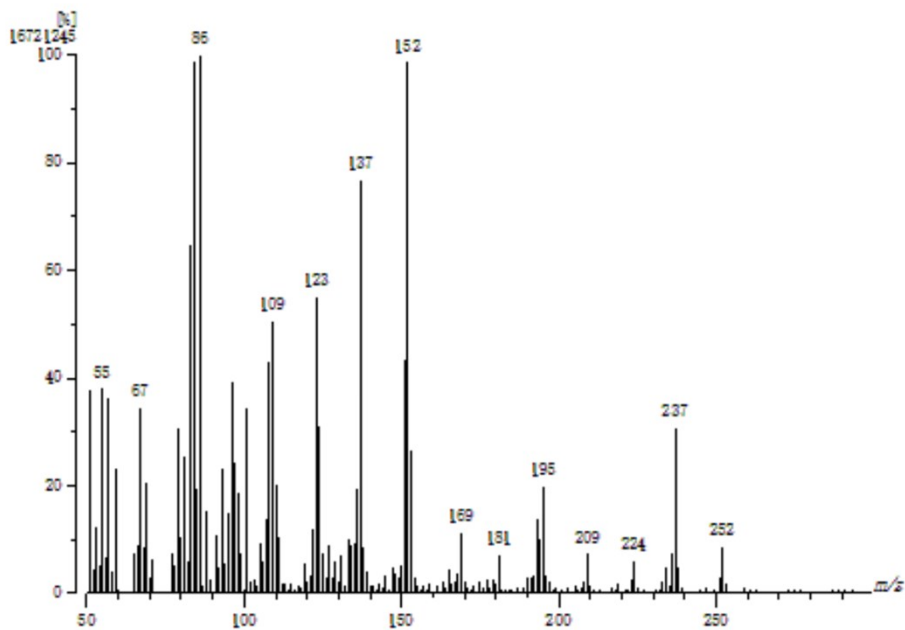

Figure S57: Mass Spectrum of (*E*)-1-(2-(4,4,5,5-tetramethyl-1,3,2-dioxaborolan-2-yl)vinyl)cyclohexan-1-ol (**2s**)<sup>7</sup>

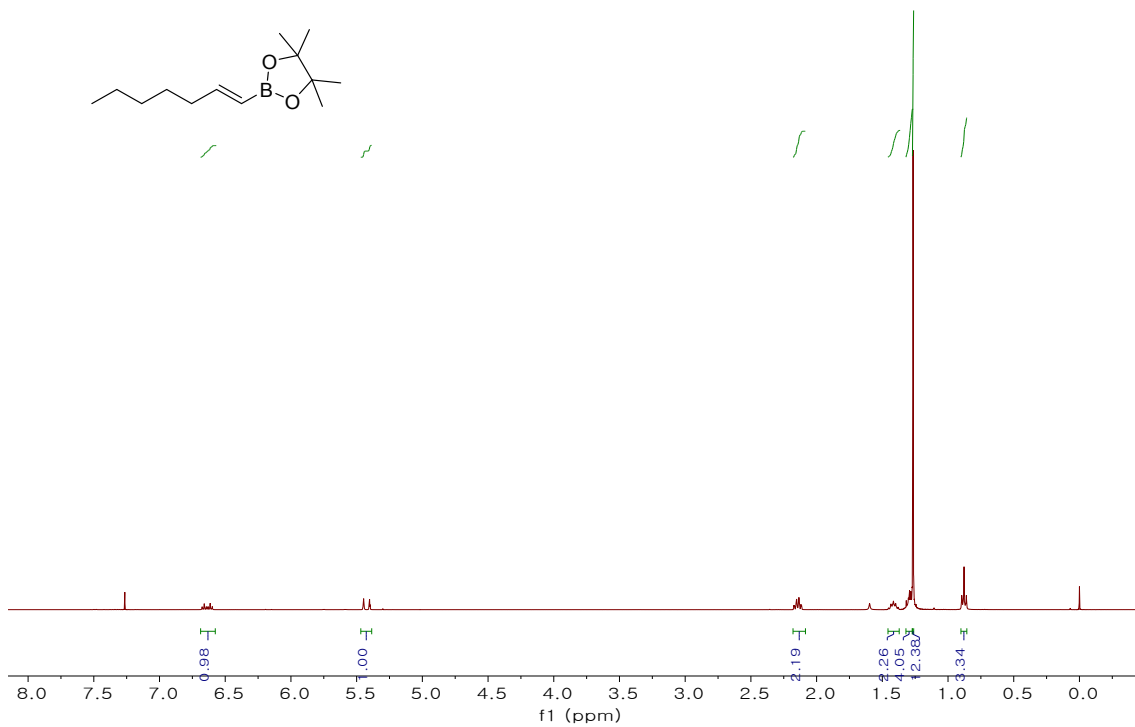

Figure S58: <sup>1</sup>H NMR of (*E*)-2-(hept-1-en-1-yl)-4,4,5,5-tetramethyl-1,3,2-dioxaborolane (**2t**)<sup>5</sup>

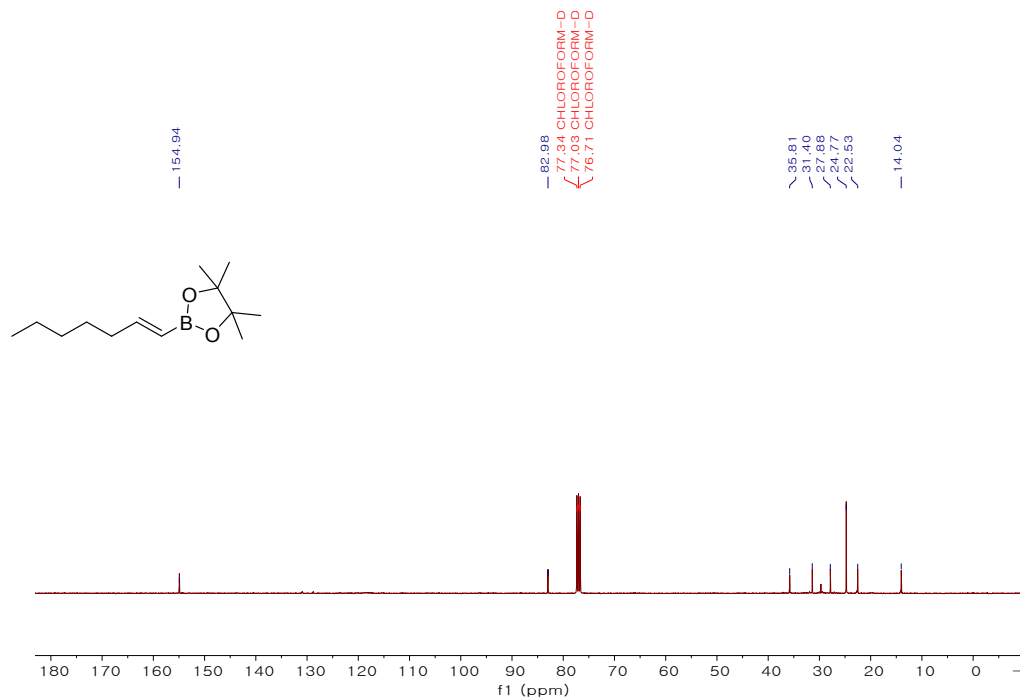

**Figure S59:** <sup>13</sup>C NMR of *(E)*-2-(hept-1-en-1-yl)-4,4,5,5-tetramethyl-1,3,2-dioxaborolane (**2t**)<sup>5</sup>

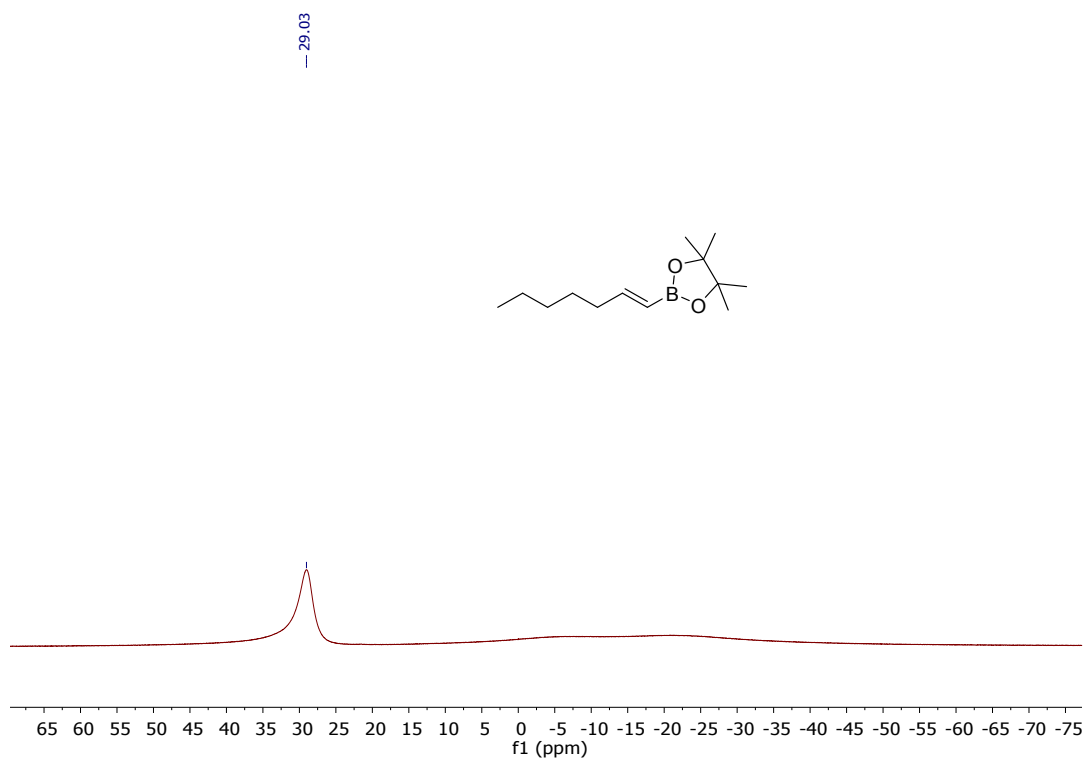

**Figure S60:** <sup>11</sup>B NMR of *(E)*-2-(hept-1-en-1-yl)-4,4,5,5-tetramethyl-1,3,2-dioxaborolane (**2t**)<sup>5</sup>



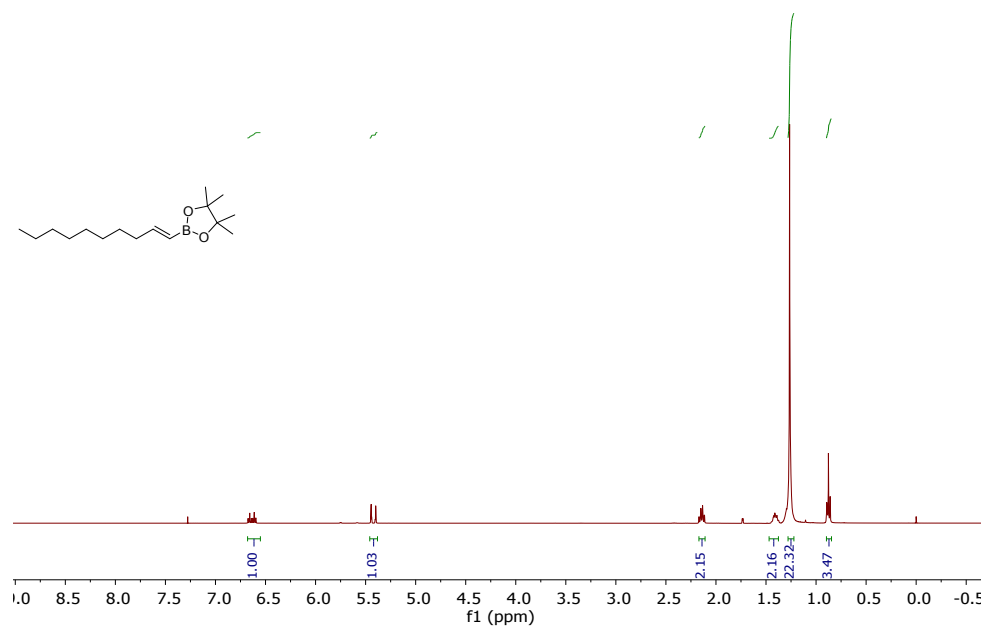

**Figure S61:** <sup>1</sup>H NMR of *(E)*-2-(dec-1-en-1-yl)-4,4,5,5-tetramethyl-1,3,2-dioxaborolane (**2u**)<sup>6</sup>

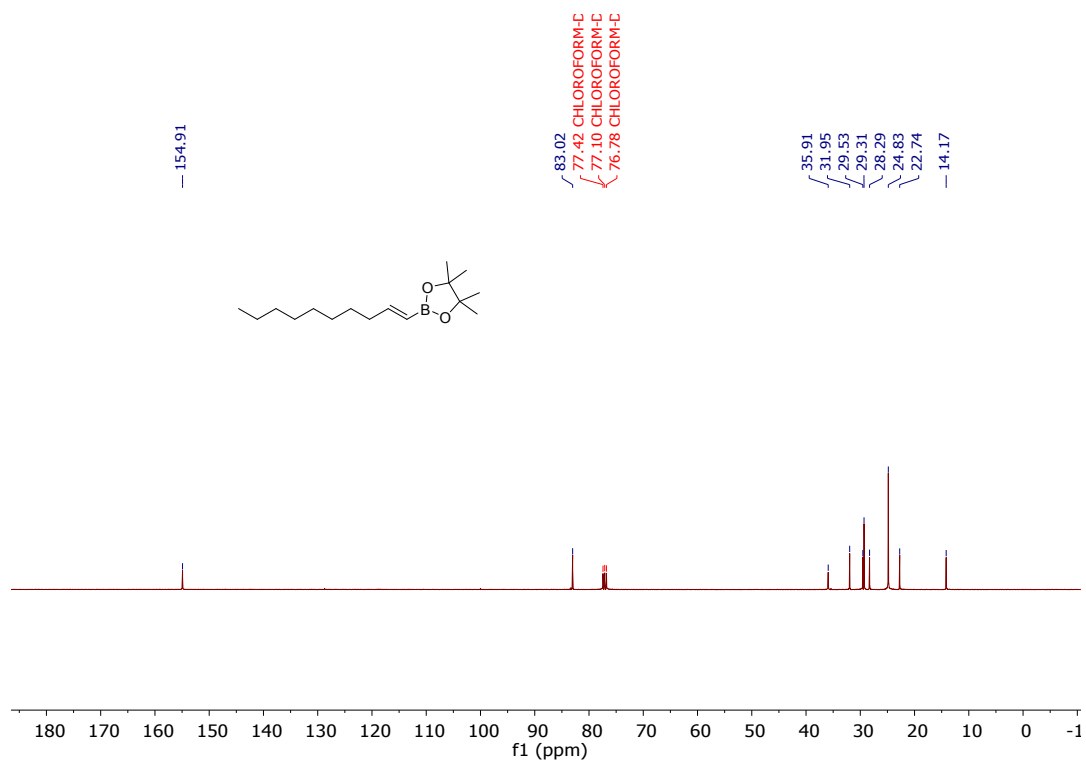

**Figure S62:** <sup>13</sup>C NMR of *(E)*-2-(dec-1-en-1-yl)-4,4,5,5-tetramethyl-1,3,2-dioxaborolane (**2u**)<sup>6</sup>

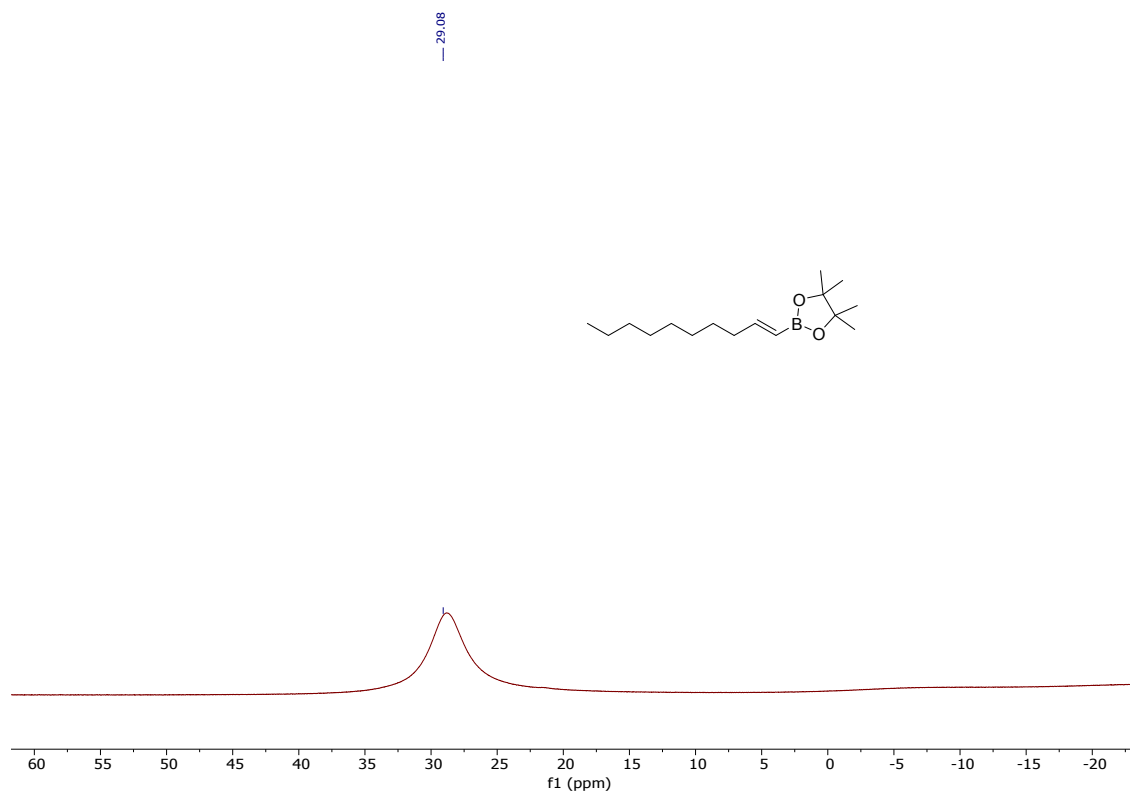

**Figure S63:**  $^{11}\text{B}$  NMR of (*E*)-2-(dec-1-en-1-yl)-4,4,5,5-tetramethyl-1,3,2-dioxaborolane (**2u**)

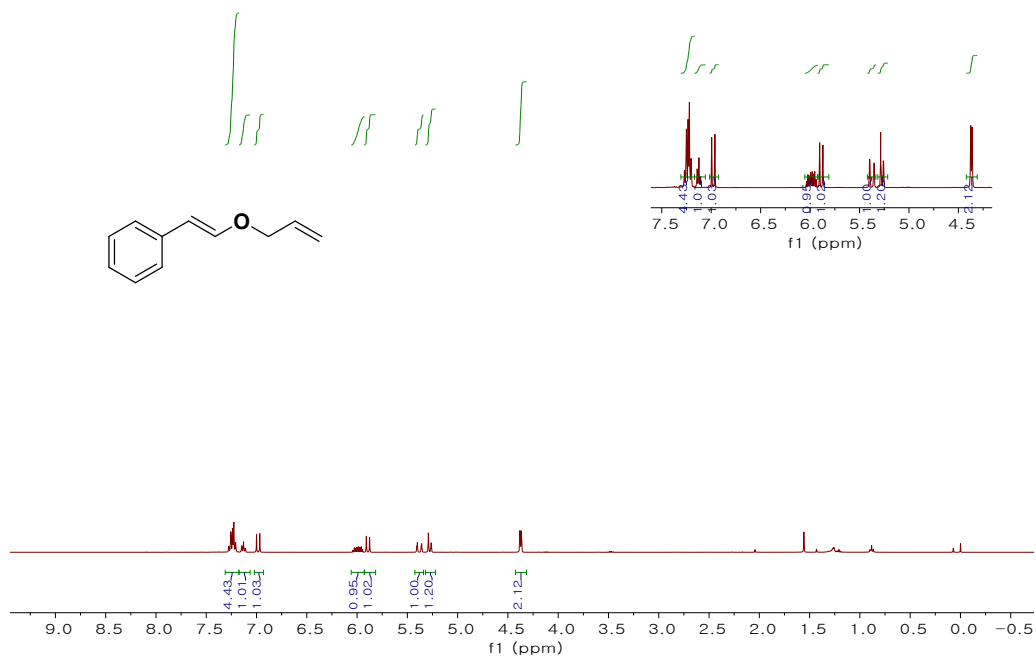

**Figure S64:**  $^1\text{H}$  NMR of (*E*)-2-(allyloxy)vinylbenzene (**3a**)<sup>8</sup>

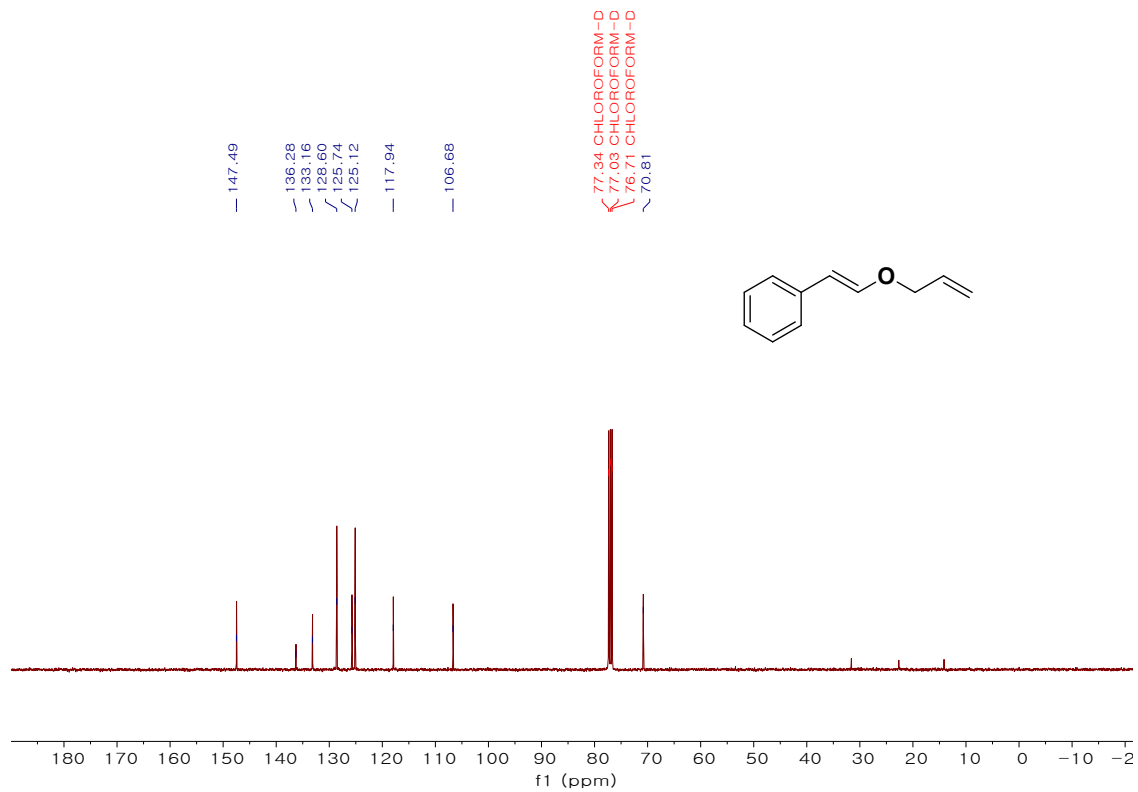

Figure S65:  $^{13}\text{C}$  NMR of (*E*)-(2-(Allyloxy)vinyl)benzene (**3a**)<sup>8</sup>

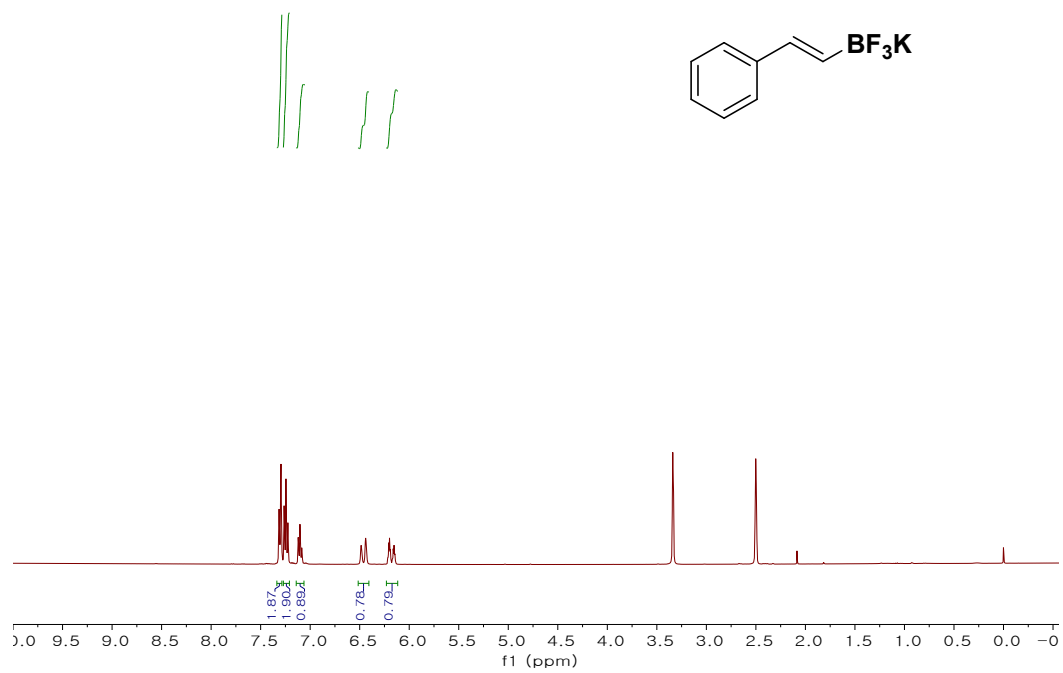

Figure S66:  $^1\text{H}$  NMR of Potassium *trans*-styryltrifluoroborate (**3b**)<sup>9</sup>

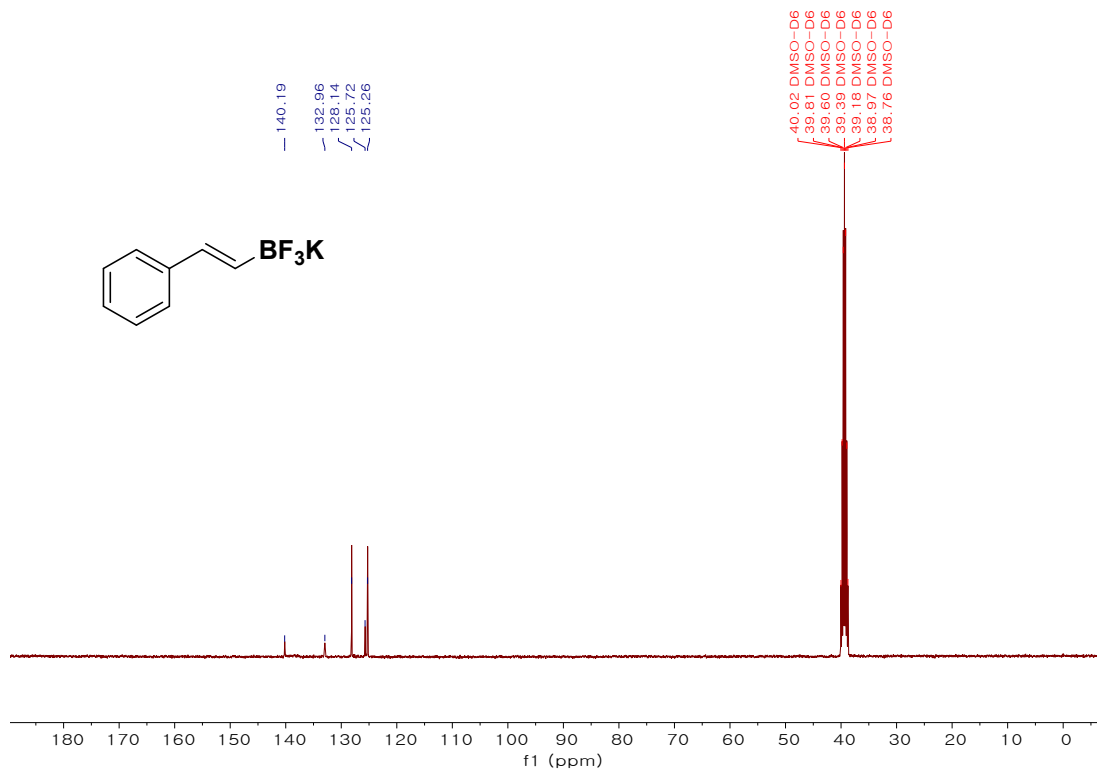

Figure S67: <sup>13</sup>C NMR of Potassium trans-styryltrifluoroborate (**3b**)<sup>9</sup>

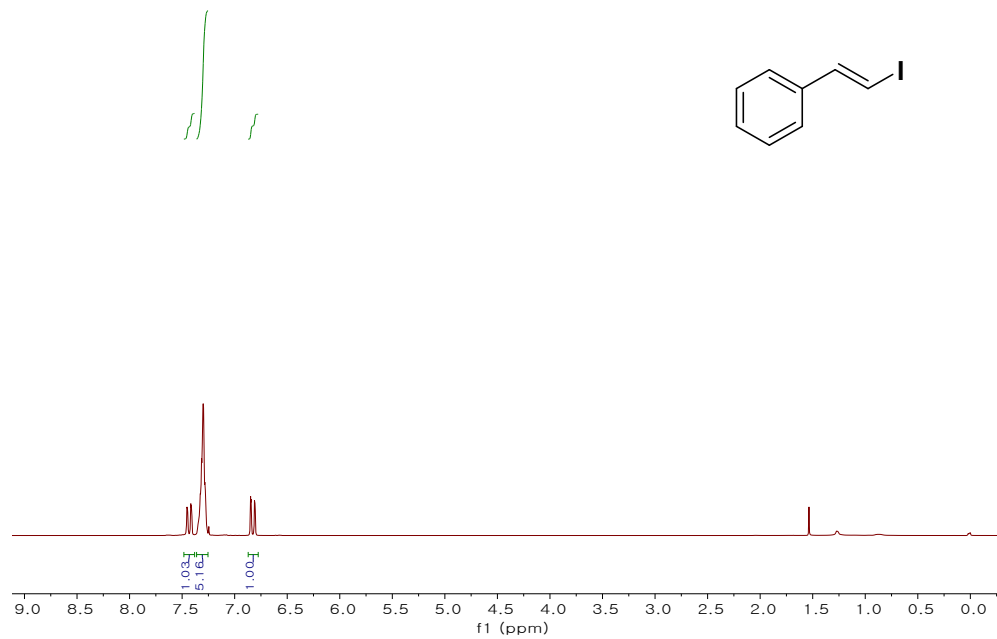

Figure S68: <sup>1</sup>H NMR of (*E*)-(2-Iodovinyl)benzene (**3c**)<sup>10</sup>

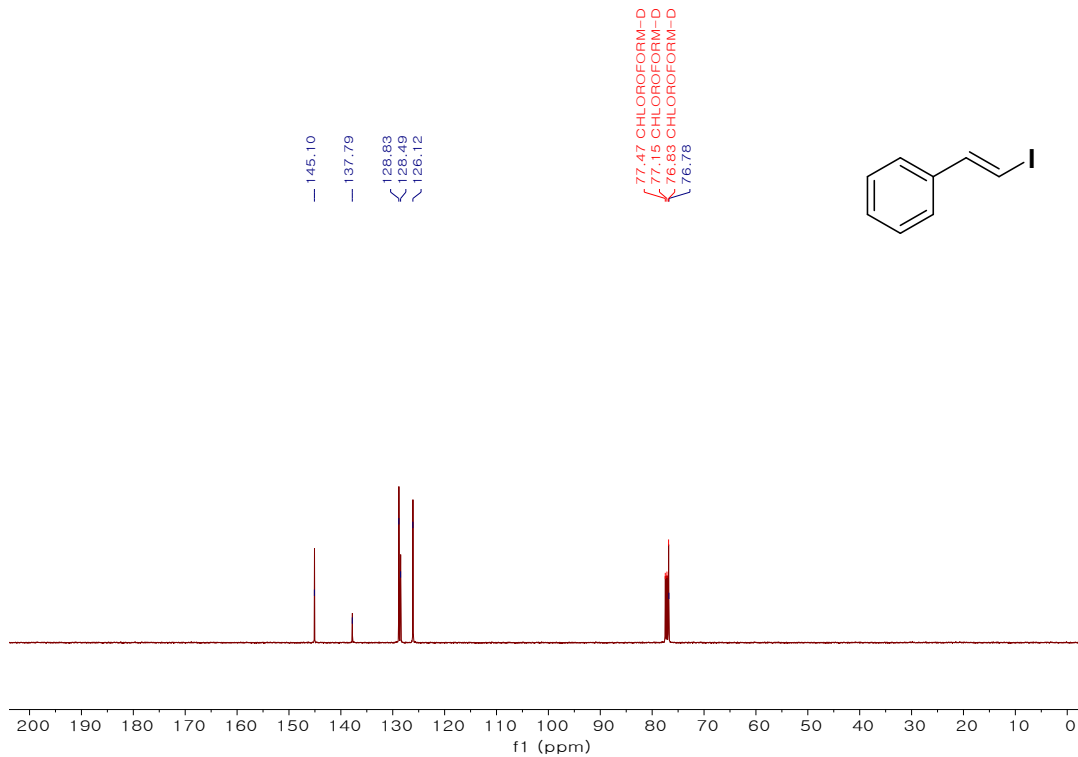

Figure S69: <sup>13</sup>C NMR of (*E*)-(2-Iodovinyl)benzene (**3c**)<sup>10</sup>

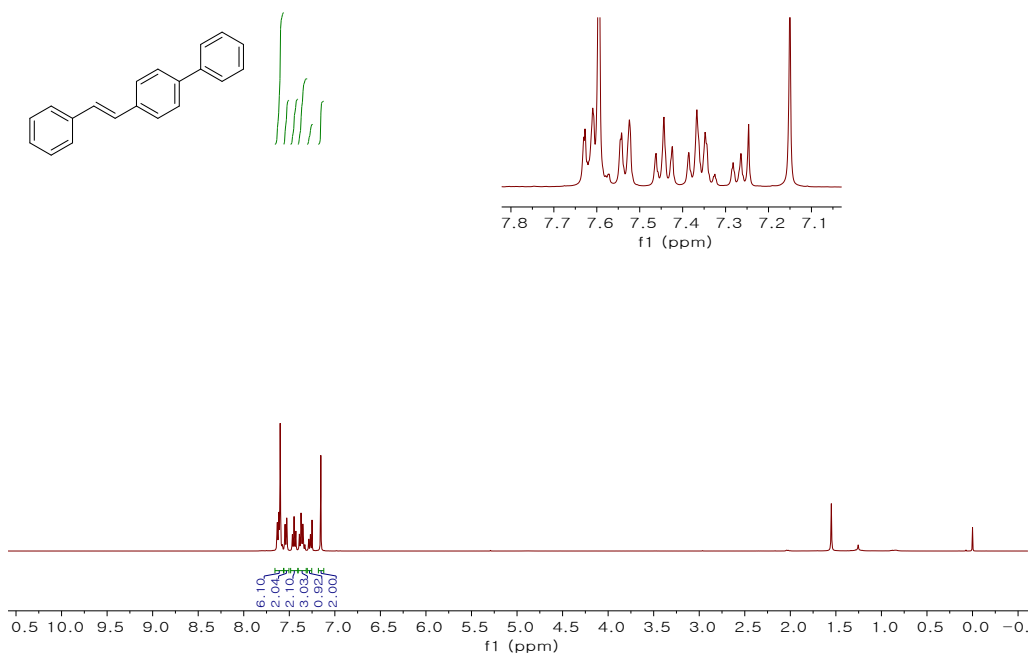

Figure S70: <sup>1</sup>H NMR of (*E*)-4-Styryl-1,1'-biphenyl (**3d**)<sup>11</sup>

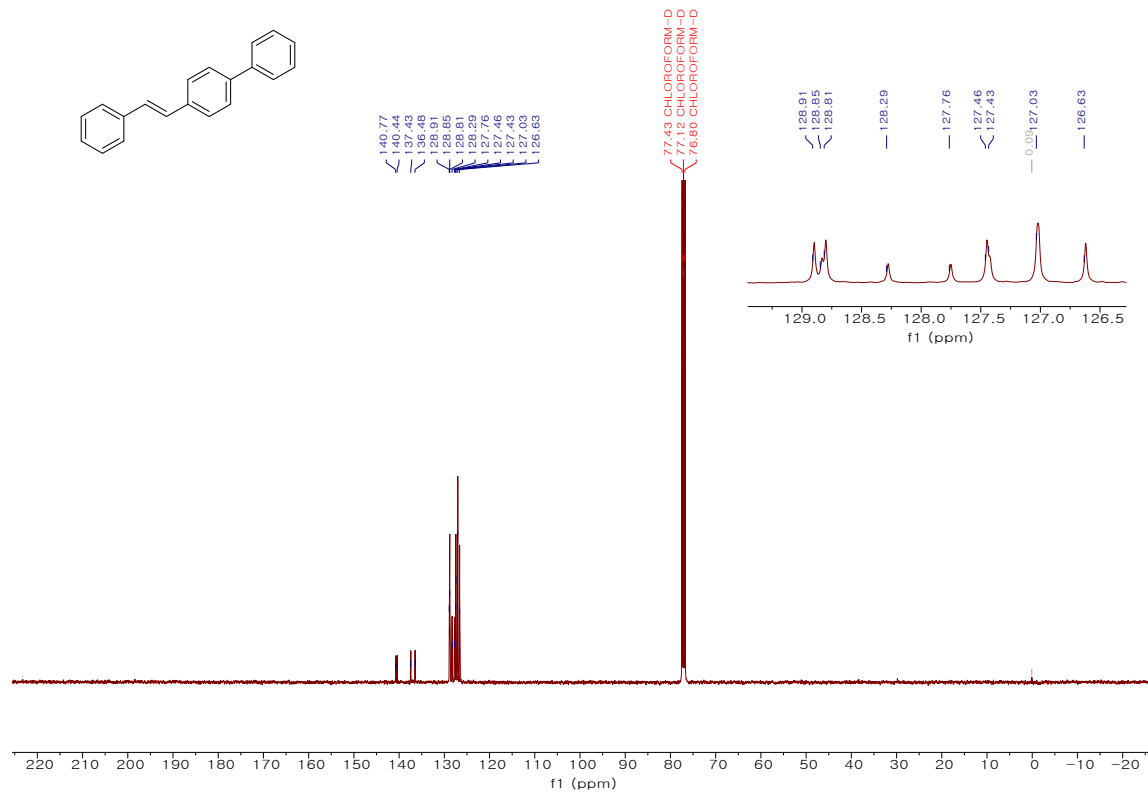

Figure S71: <sup>13</sup>C NMR of *(E)*-4-Styryl-1,1'-biphenyl (**3d**)<sup>11</sup>

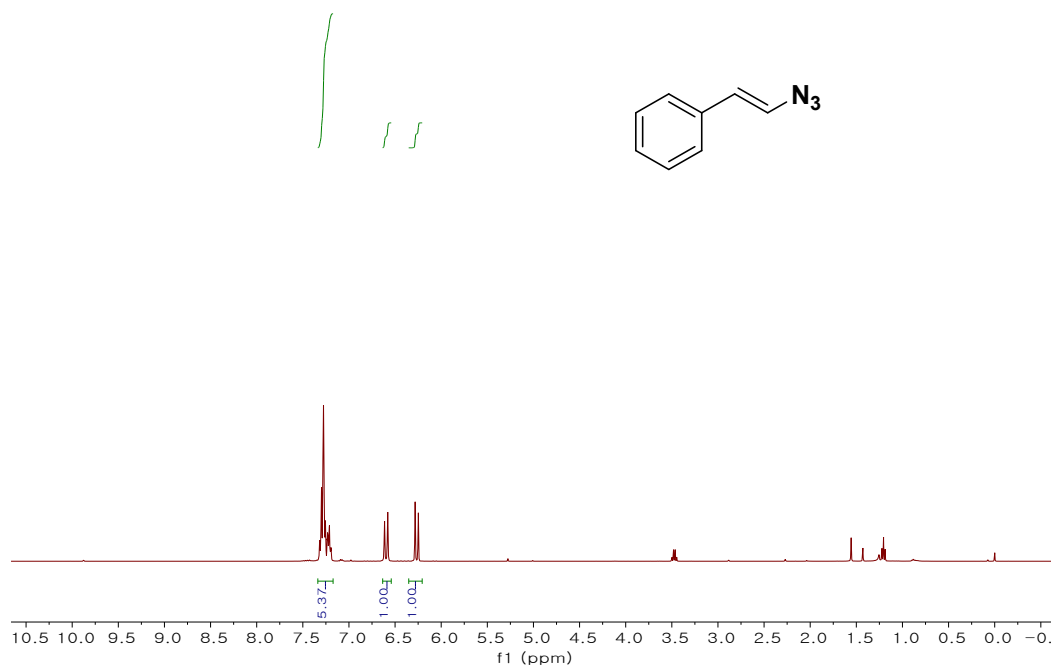

Figure S72: <sup>1</sup>H NMR of *(E)*-(2-Azidovinyl)benzene (**3e**)<sup>10</sup>



Alkyne-crude

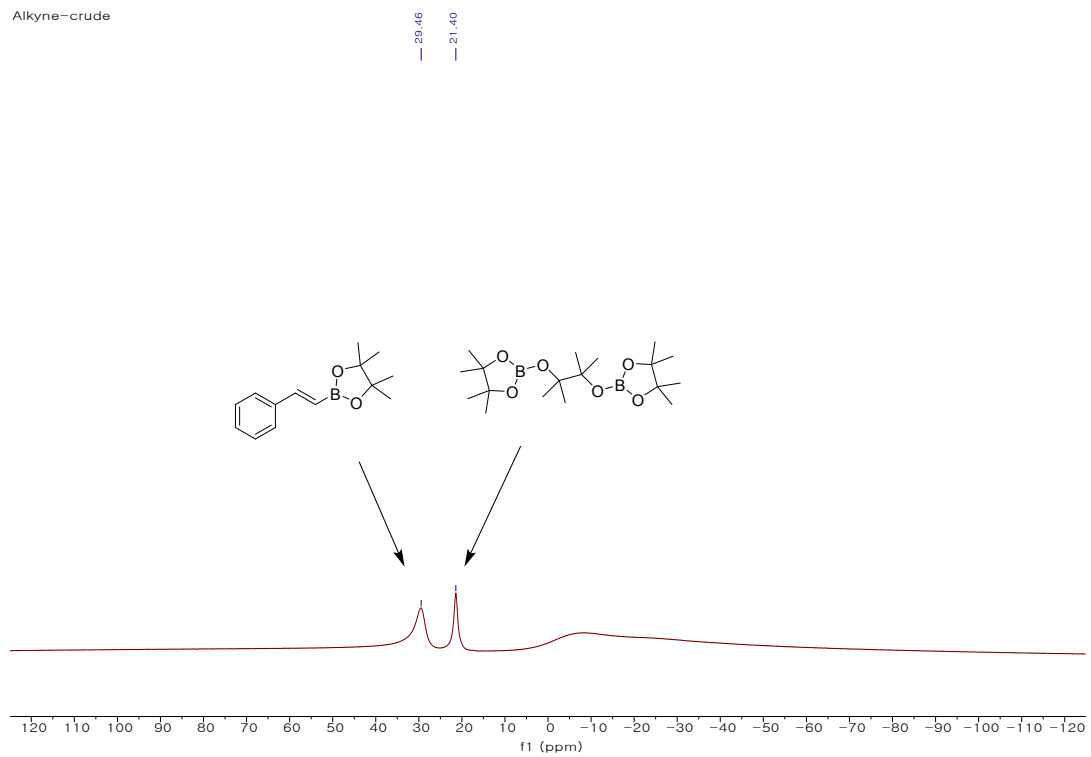

**Figure S75:**  $^{11}\text{B}$  NMR of crude reaction mixture of phenyl acetylene and HBpin in  $\text{CDCl}_3$ <sup>15</sup>



## II. Chemoselective hydroboration of phenyl acetylene over ester

**Scheme 1.** Chemoselective hydroboration of phenyl acetylene<sup>a</sup>

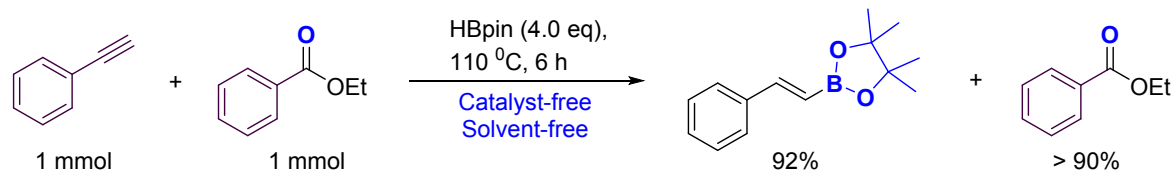

<sup>a</sup>Yields were calculated based on <sup>1</sup>H NMR, Using 1,3,5-trimethoxybenzene as an internal standard.

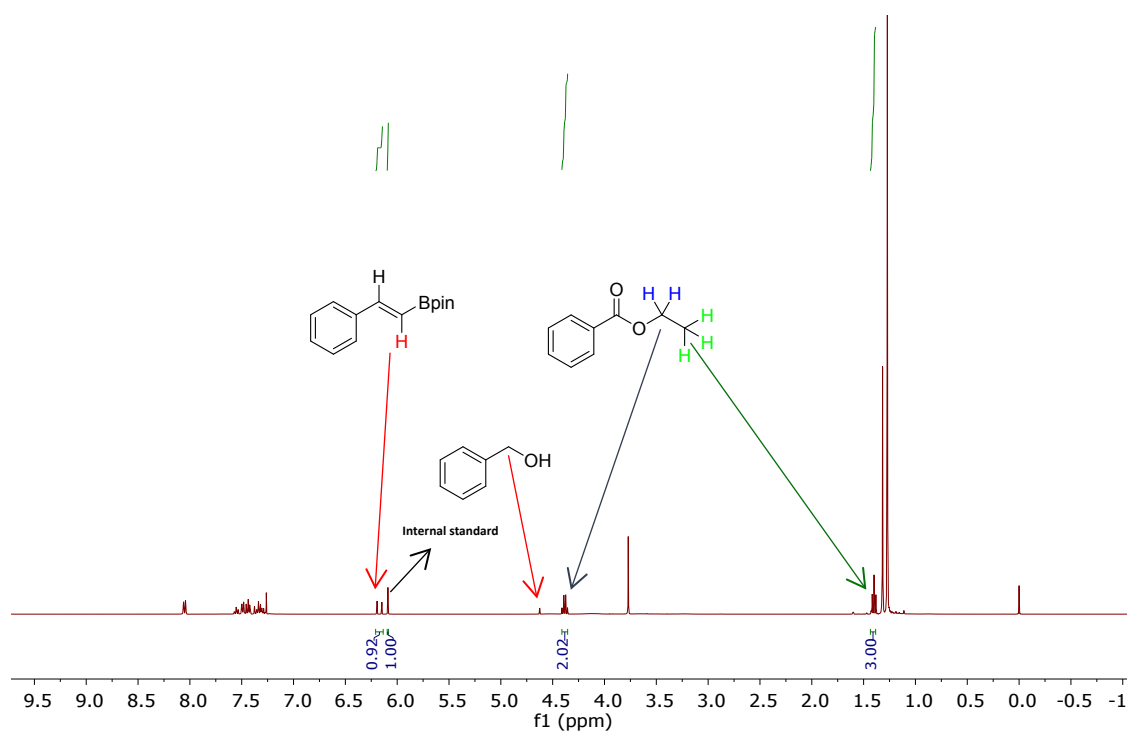

### III. References:

1. A. Bismuto, S. P. Thomas, M. J. Cowley, *Angew. Chem.*, 2016, **55**, 15356.
2. S. Chen, L. Yang, D. Yi, Q. Fu, Z. Zhang, W. Liang, Q. Zhang, J. Ji, W. Wei, *RSC Adv.*, 2017, **7**, 26070.
3. C. M. Deng, Y. F. Ma, Y. M. Wen, *Chem. Select.*, 2018, **3**, 1202.
4. S. Mandal, P. K. Varma, K. Geetharani, *Chem. Commun.*, 2018, **54**, 13690.
5. D. P. Ojha, K. R. Prabhu, *Org. Lett.*, 2016, **18**, 432.
6. R. Mamidala, V. K. Pandey and A. Rit, *Chem Commun.*, 2019, **55**, 989.
7. M. Magre, B. Maity, A. Falconnet, L. Cavallo, M. Rueping, *Angew. Chem. Int. Ed.*, 2019, **58**, 7025.
8. Ryan E. Shade, Alan M. Hyde, John-Carl Olsen, Craig A. Merlic, *J. Am. Chem. Soc.*, 2010, **132**, 1202.
9. C. Cazorla, E. Méta y and M. Lemaire, *Tetrahedron*, 2011, **67**, 8615.
10. H. Yang, Y. Li, M. Jiang, J. Wang and H. Fu, *Chem. Eur. J.*, 2011, **17**, 5652.
11. S. Wang, H. Song, X. Wang, N. Liu, H. Qin and C. Zhang, *Chem Commun.*, 2016, **52**, 11893.
12. S. Mandal, S. Mandal, K. Geetharani, *Chem. Asian. J.*, 2019, **14**, 4553.
13. J. Bhattacharjee, A. Harinath, K. Bano, T. K. Panda, *ACS Omega*, 2020, **5**, 1595.
14. X. Zeng, C. Gong, H. Guo, H. Xu, J. Zhang, J. Xie, *New J. Chem.*, 2018, **42**, 17346.
15. (a) W. Clegg, A. J. Scott, C. Dai, G. Lesley, T. B. Marder, N. C. Norman, L. J. Farrugia, *Acta Cryst. C.*, 1996, **52**, 2545-2547; (b) M. R. Espinosa, D. J. Charboneau, A. G. de Oliveira, N. Hazari, *ACS Catal.*, 2019, **9**, 301.
